# Supplementary material for: NLRP3/Caspase-1-Mediated Pyroptosis of Astrocytes Induced by Antipsychotics Is Inhibited by a Histamine H1 Receptor-Selective Agonist
Source: PubMed Central journal article supplement (PMC9125084; doi:10.3389/fnagi.2022.847561), 2022-05-09

1. Supplementary figure 1.

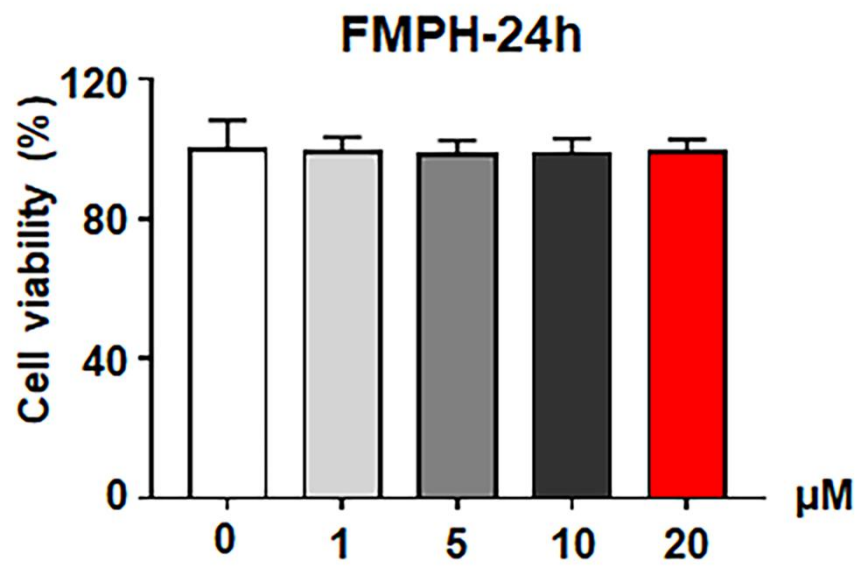

2. Supplementary figure 2.

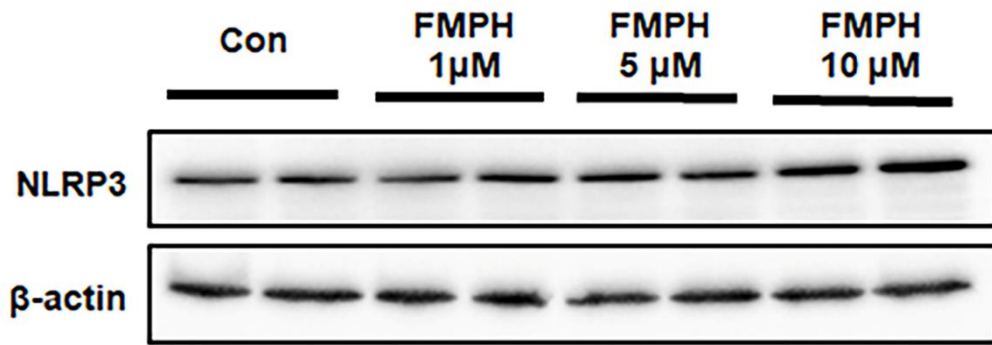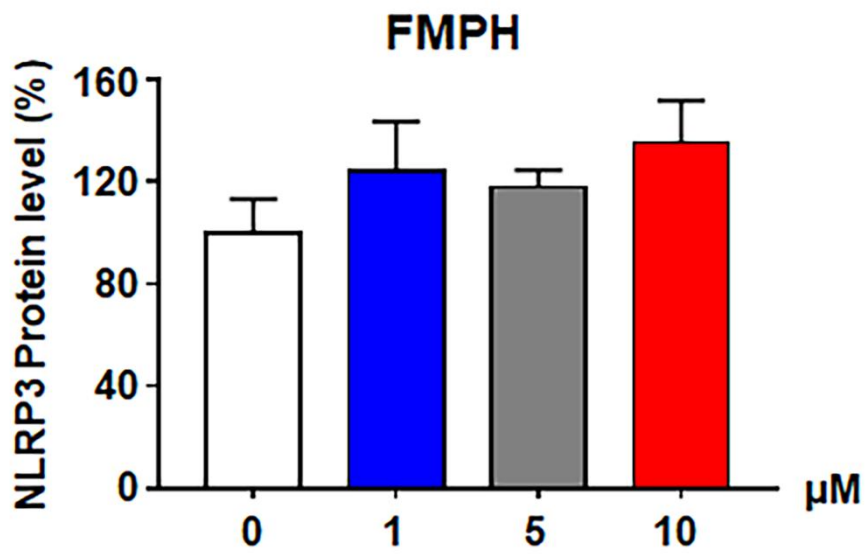

### 3. Supplementary figure 3. Original images in figure 2A and D

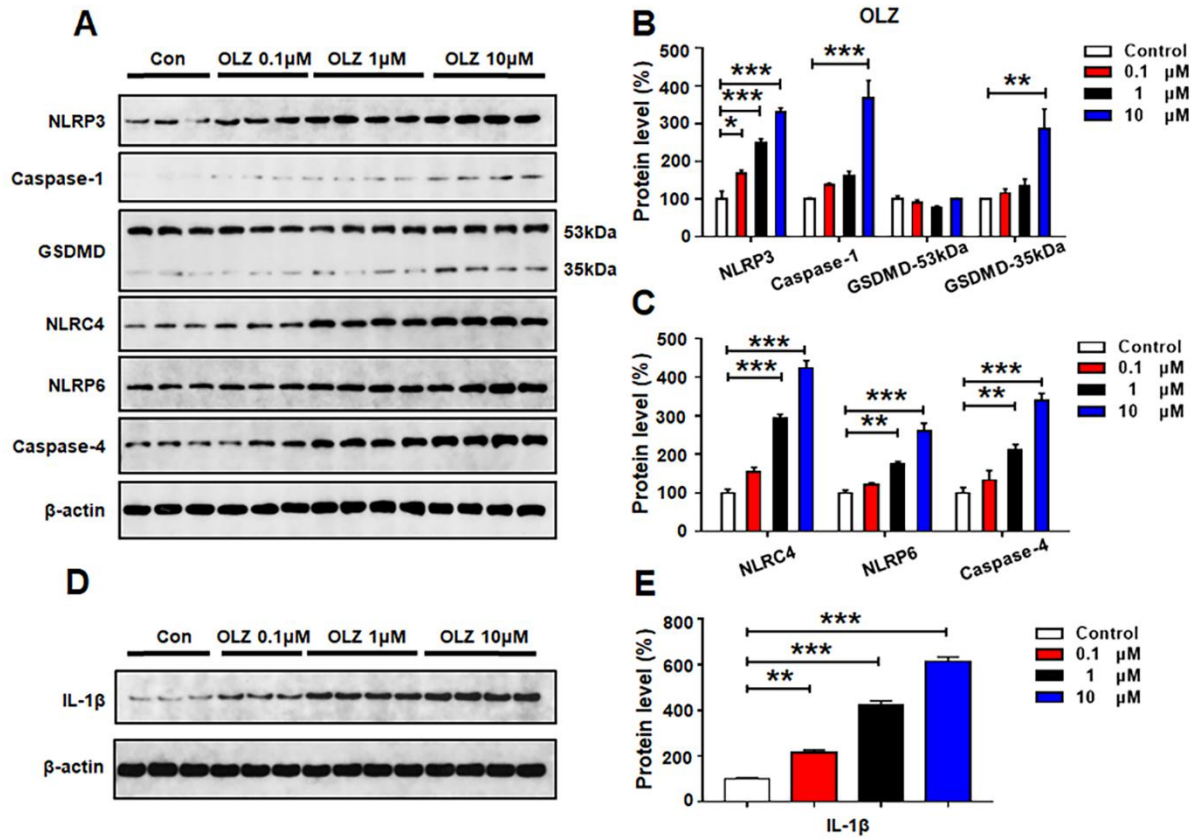

#### 3.1 OLZ-NLRP3

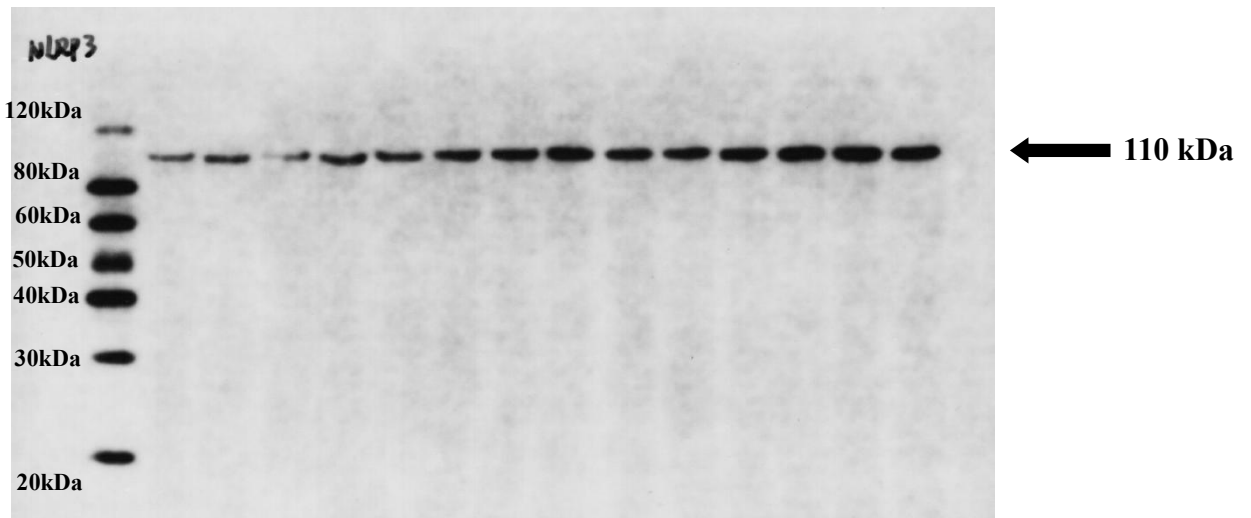

### 3.2 OLZ-Caspase1

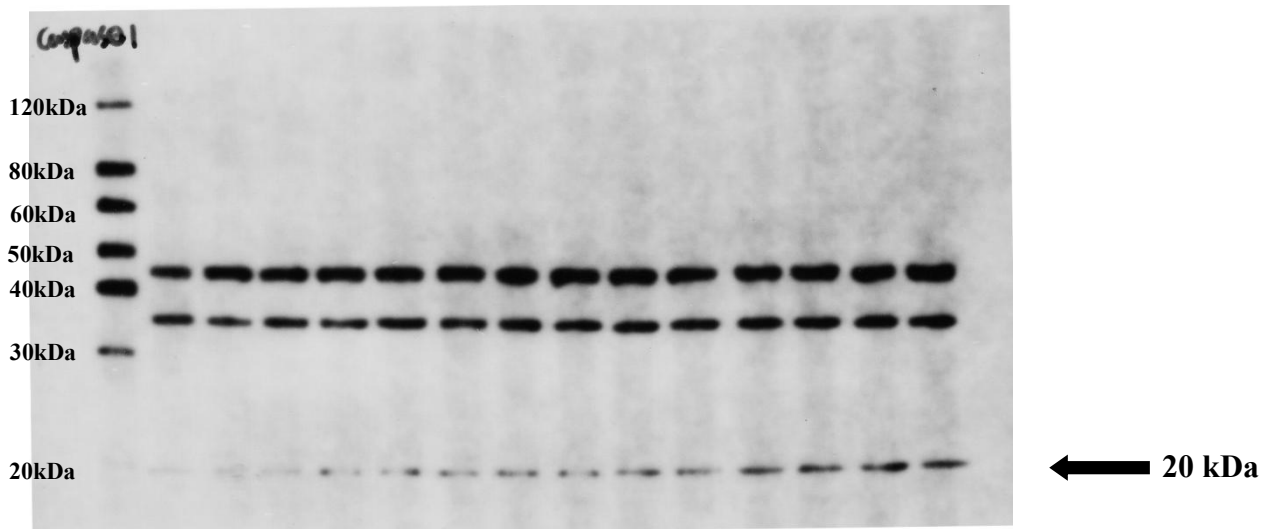

### 3.3 OLZ-GSDMD

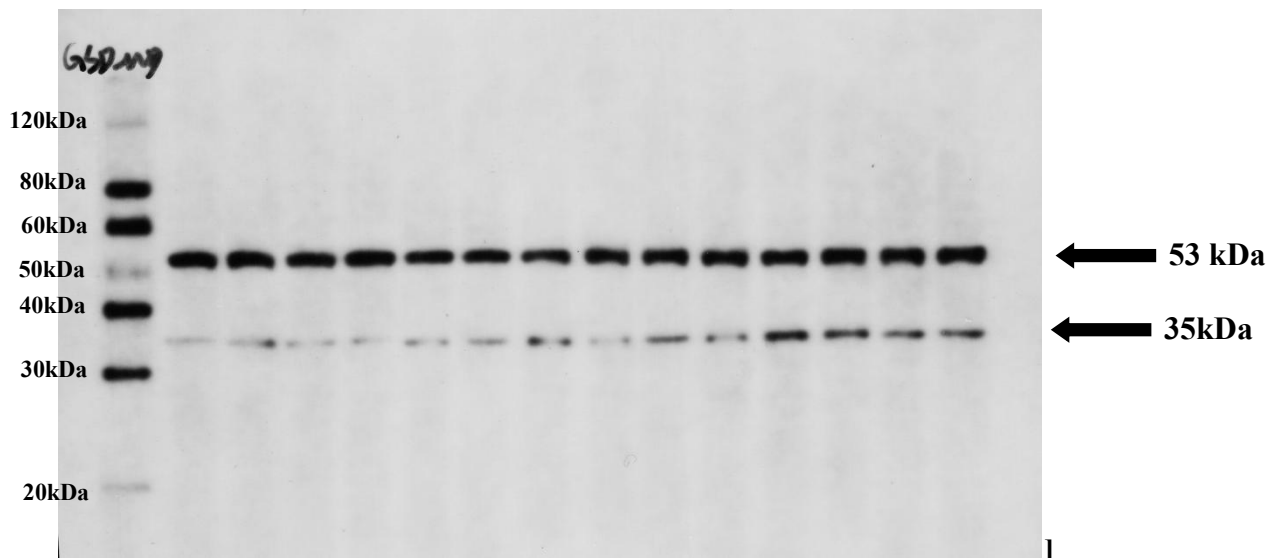

### 3.4 OLZ-NLR4

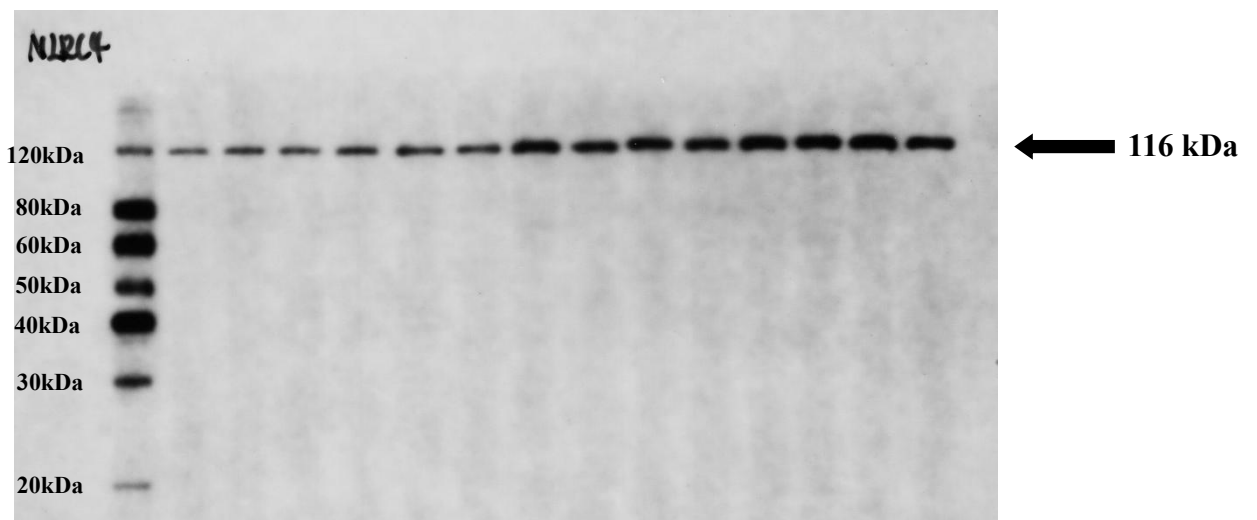

### 3.5 OLZ-NLRP6

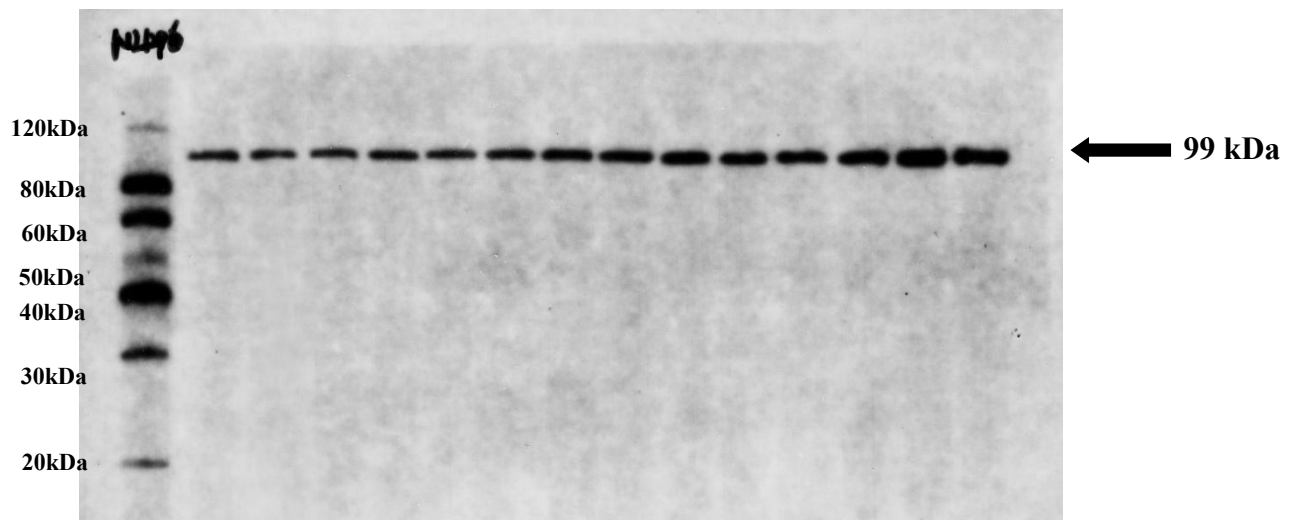

### 3.6 OLZ-Caspase4

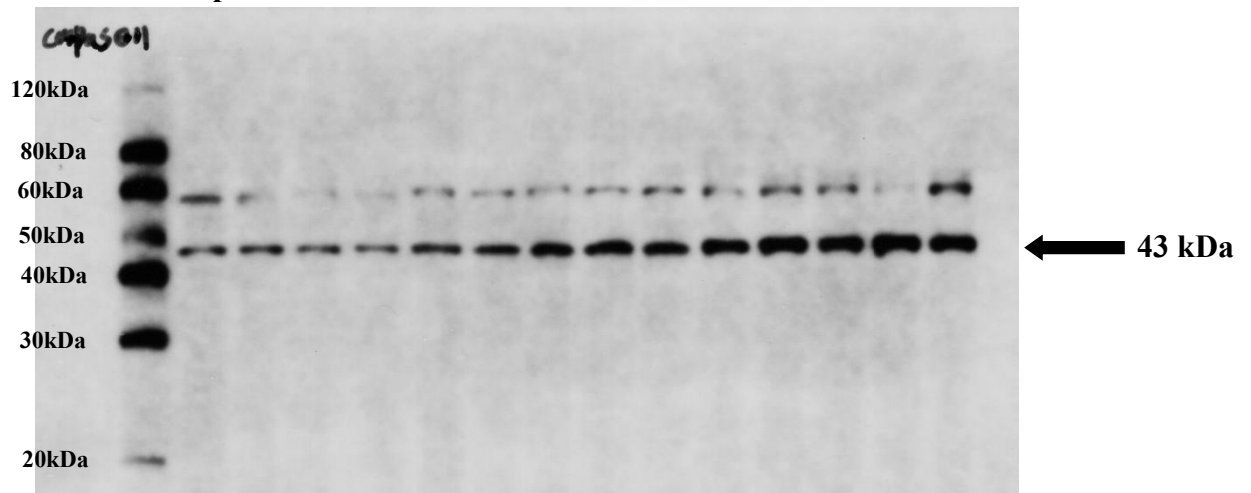

### 3.7 OLZ-β-actin

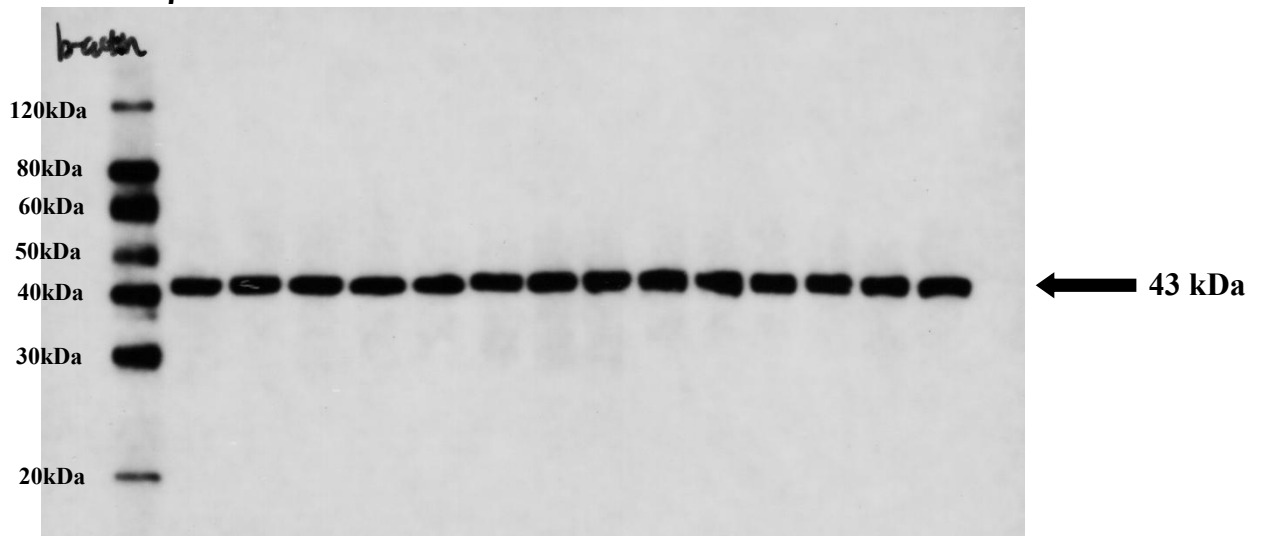

### 3.8 OLZ-IL-1 $\beta$

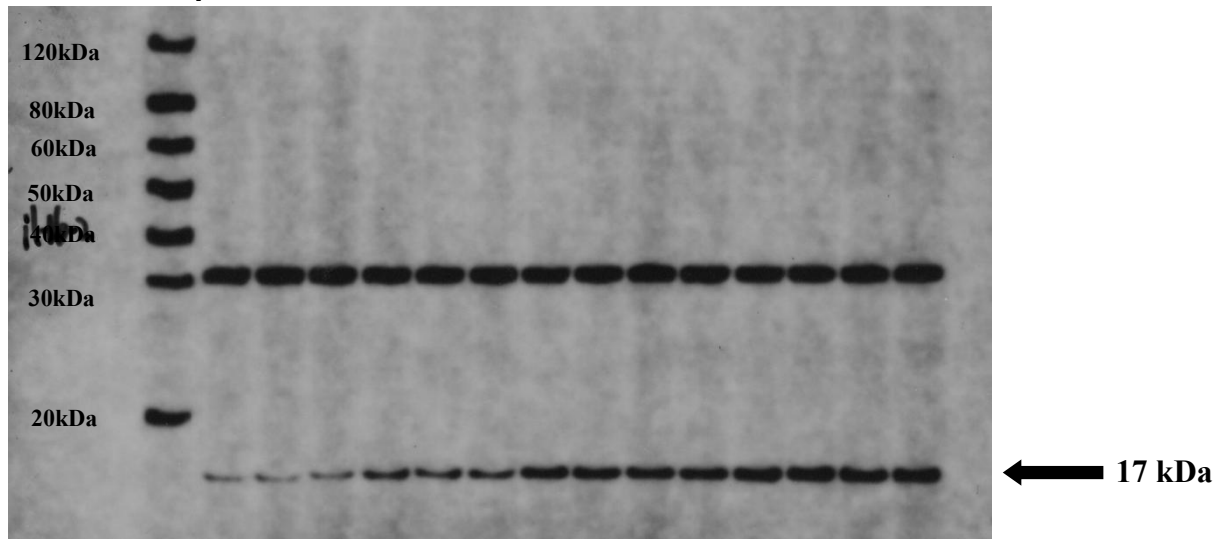

### 3.9 OLZ- $\beta$ -actin

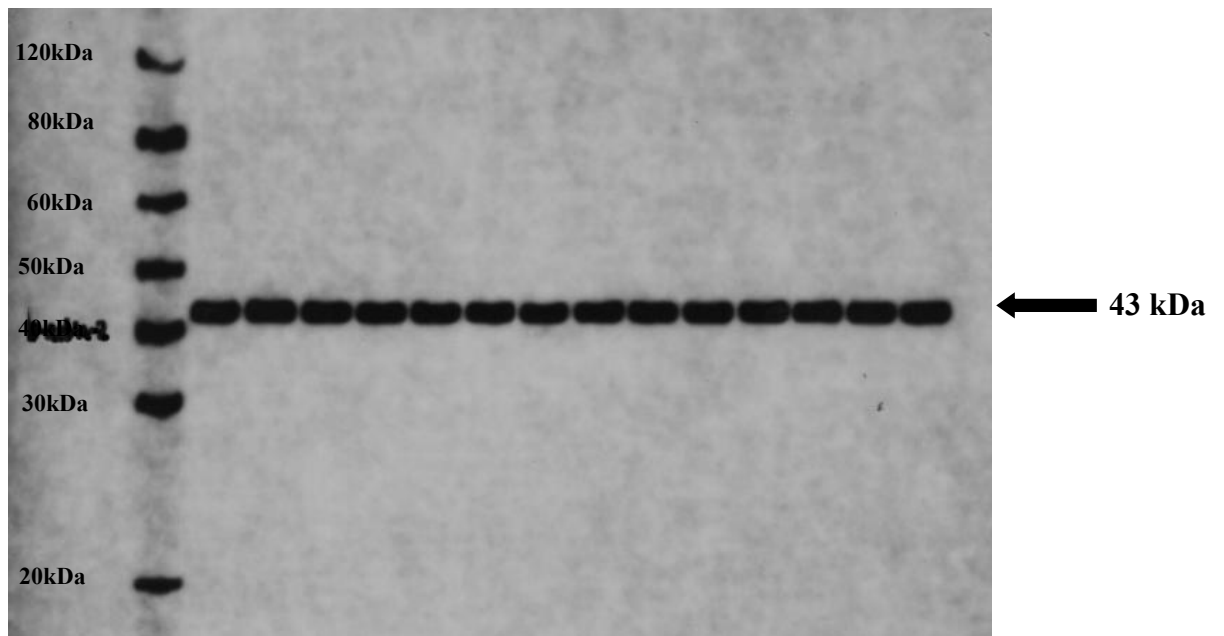

#### 4. Supplementary figure 4. Original images in figure 3A and D

##### 4.1 QUE-NLRP3

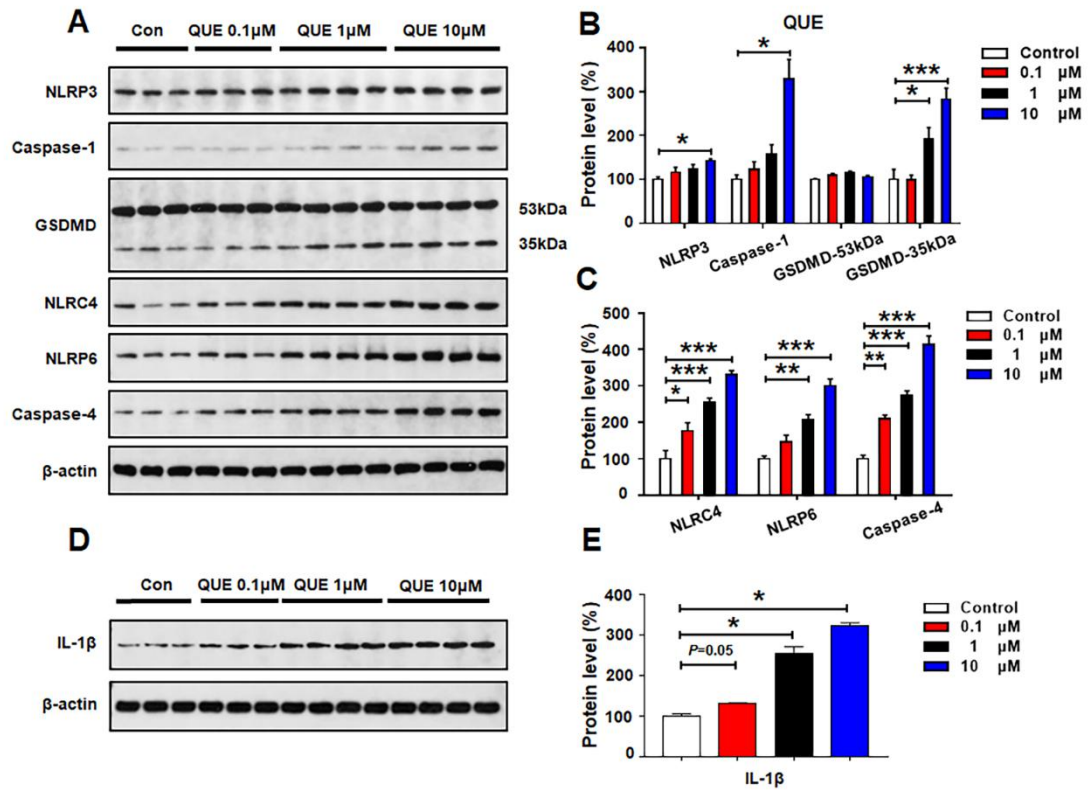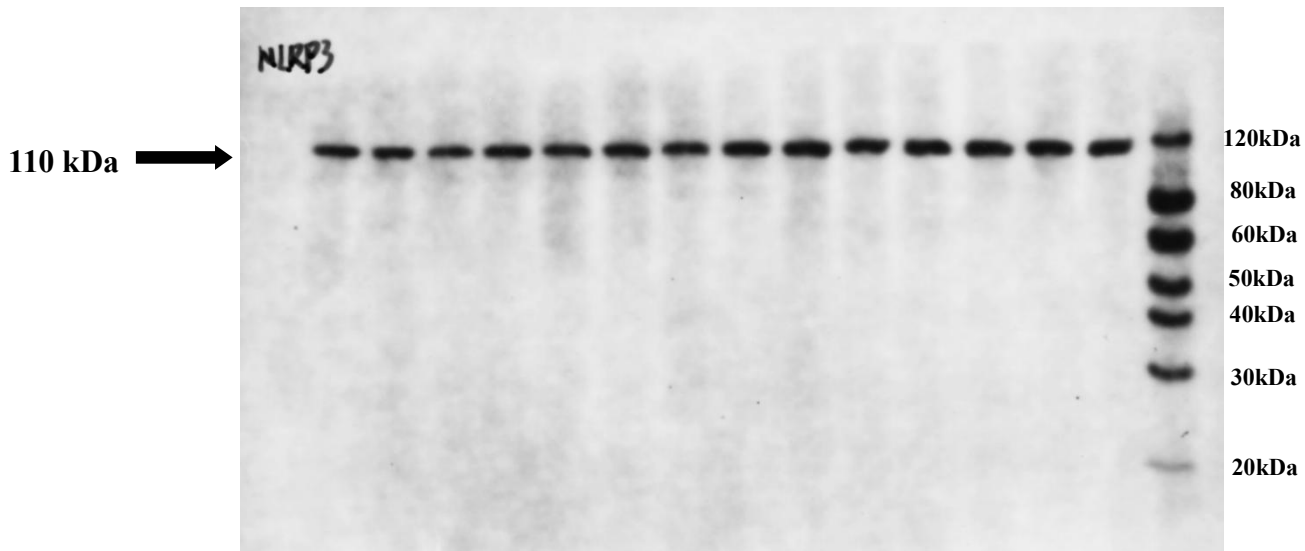

#### 4.2 QUE-Caspase1

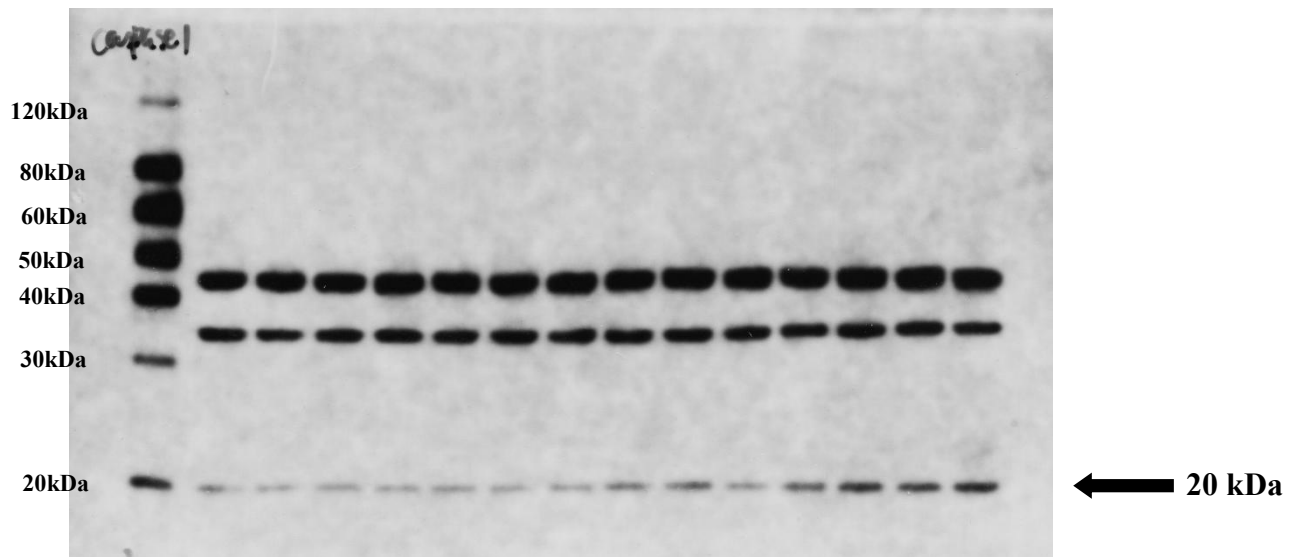

#### 4.3 QUE-GSDMD

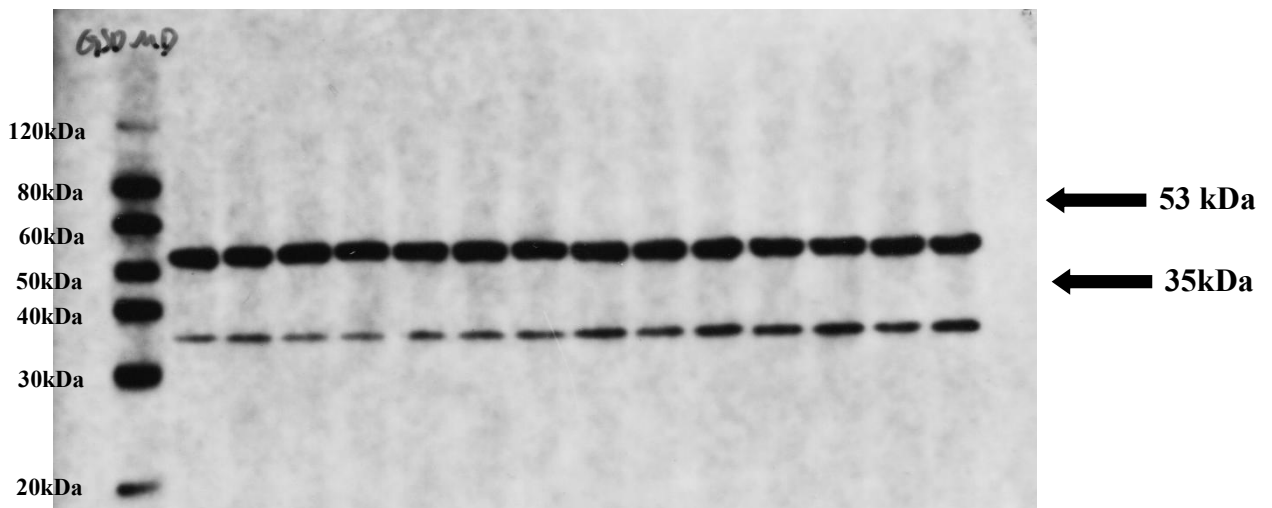

#### 4.4 QUE-NLRC4

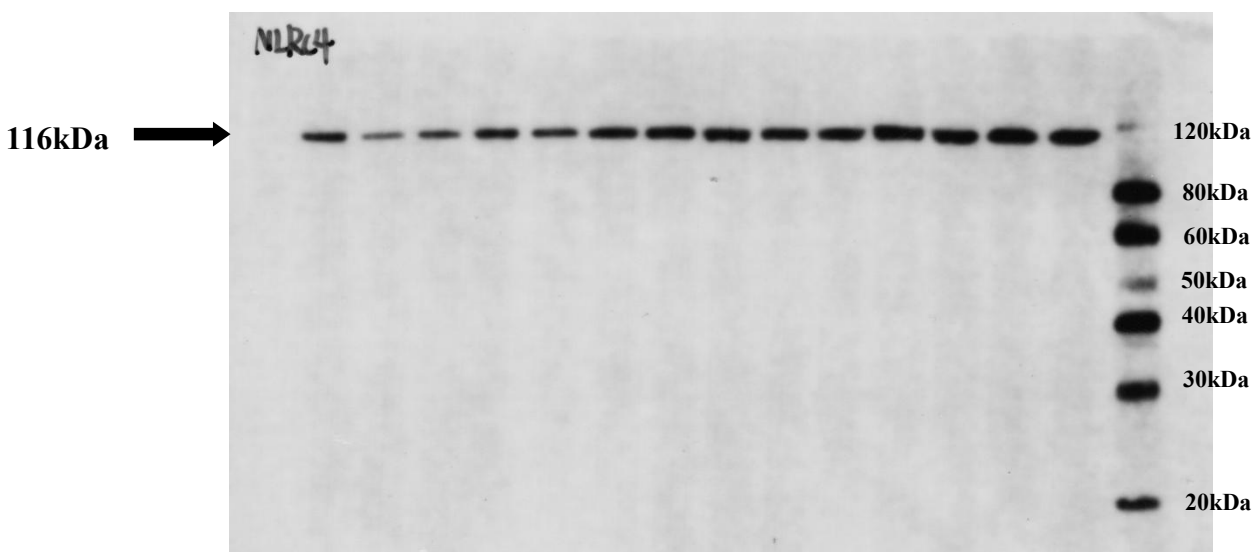



#### 4.5 QUE-NLRP6

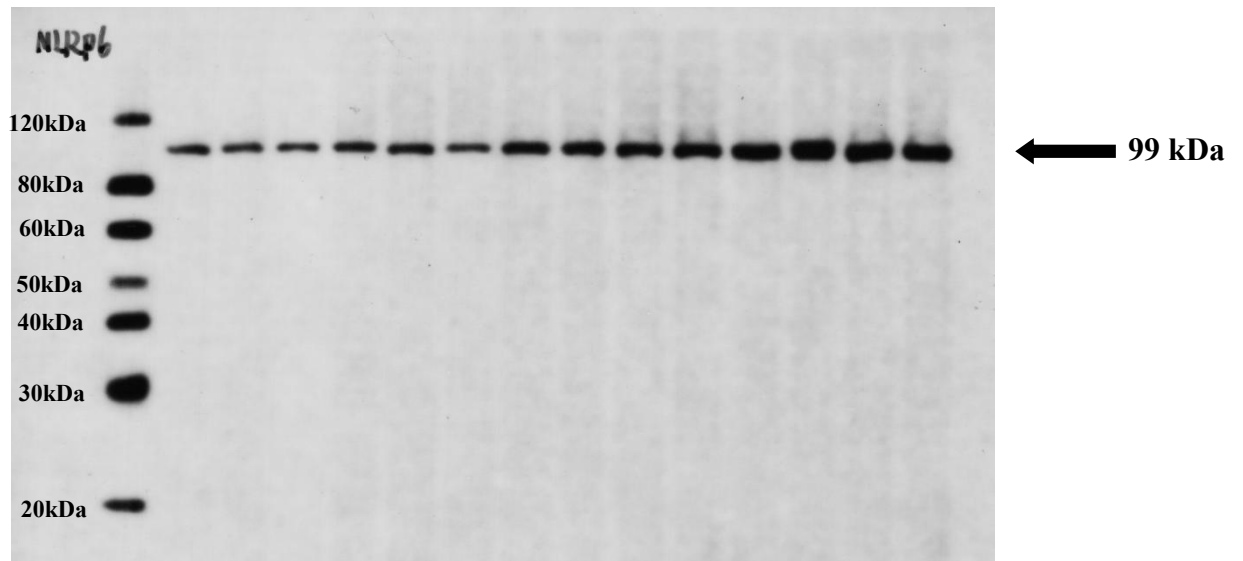

#### 4.6 QUE-Caspase4

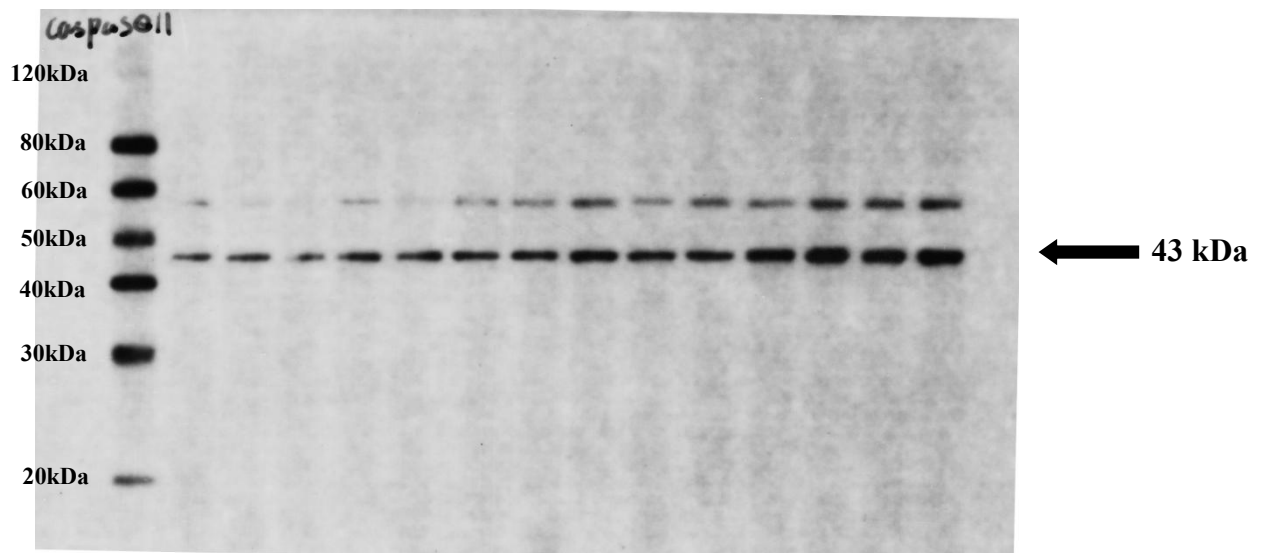

#### 4.7 QUE-Actin

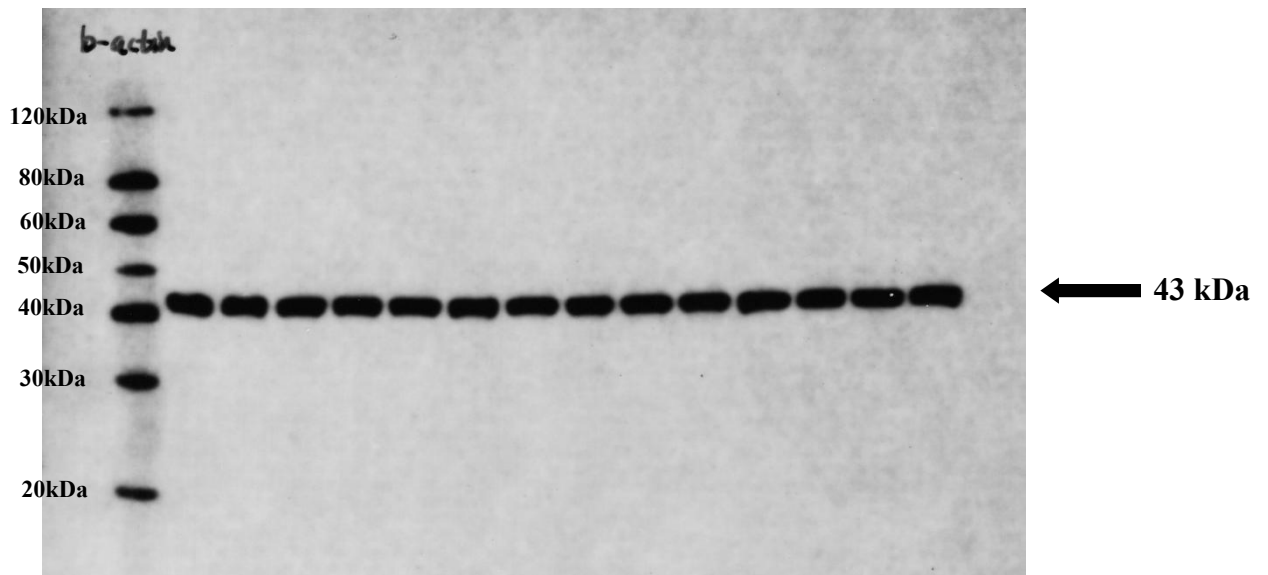

#### 4.8 QUE-IL-1 $\beta$

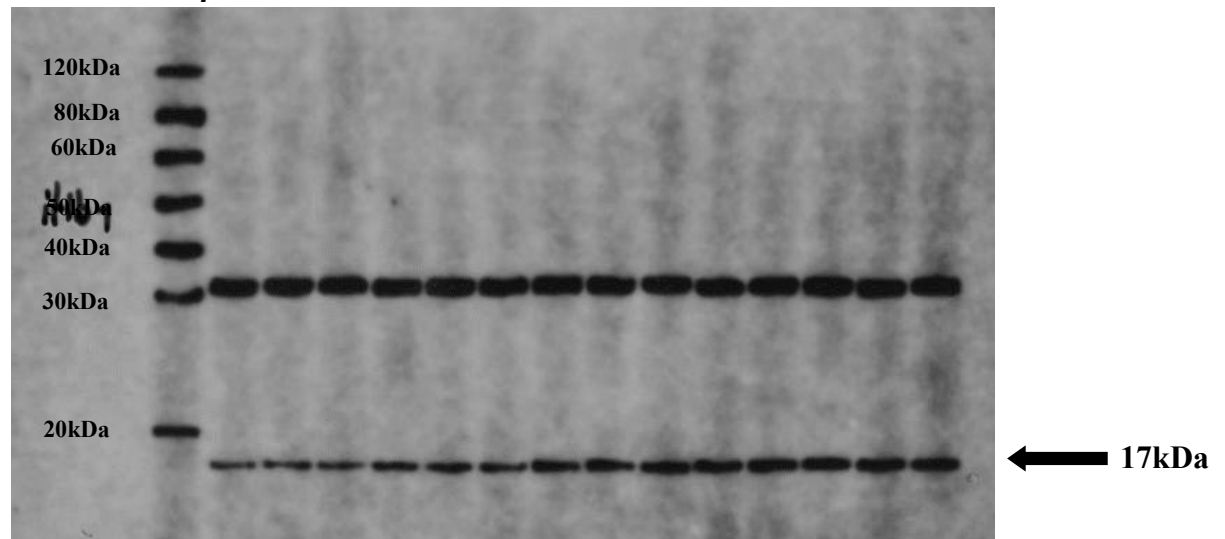

#### 4.9 QUE- $\beta$ -actin

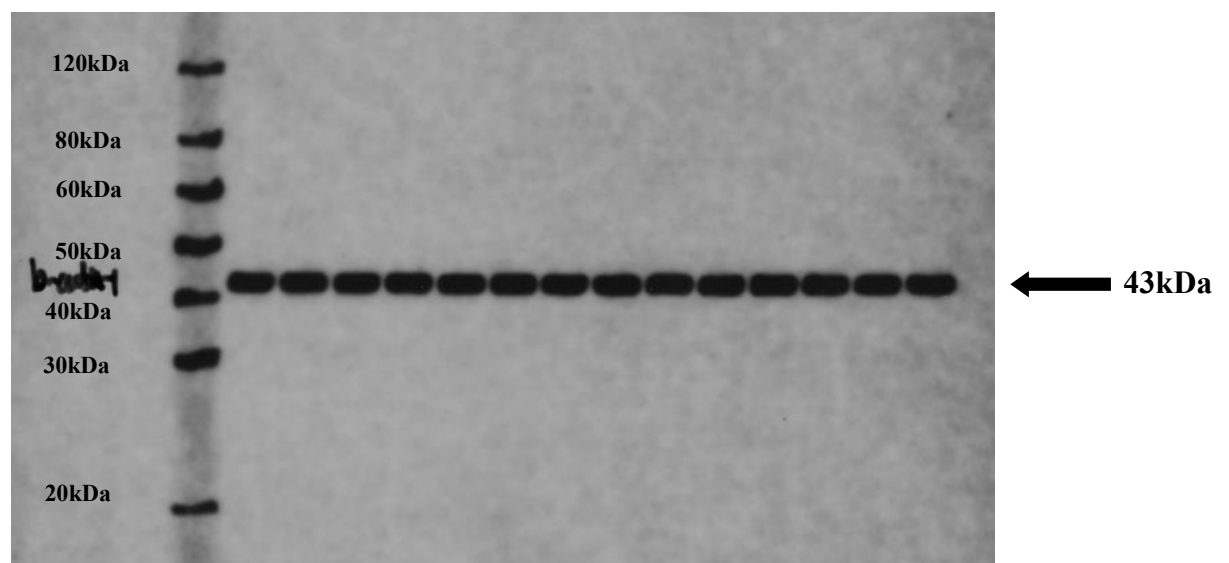

## 5. Supplementary figure 5. Original images in figure 4A and D

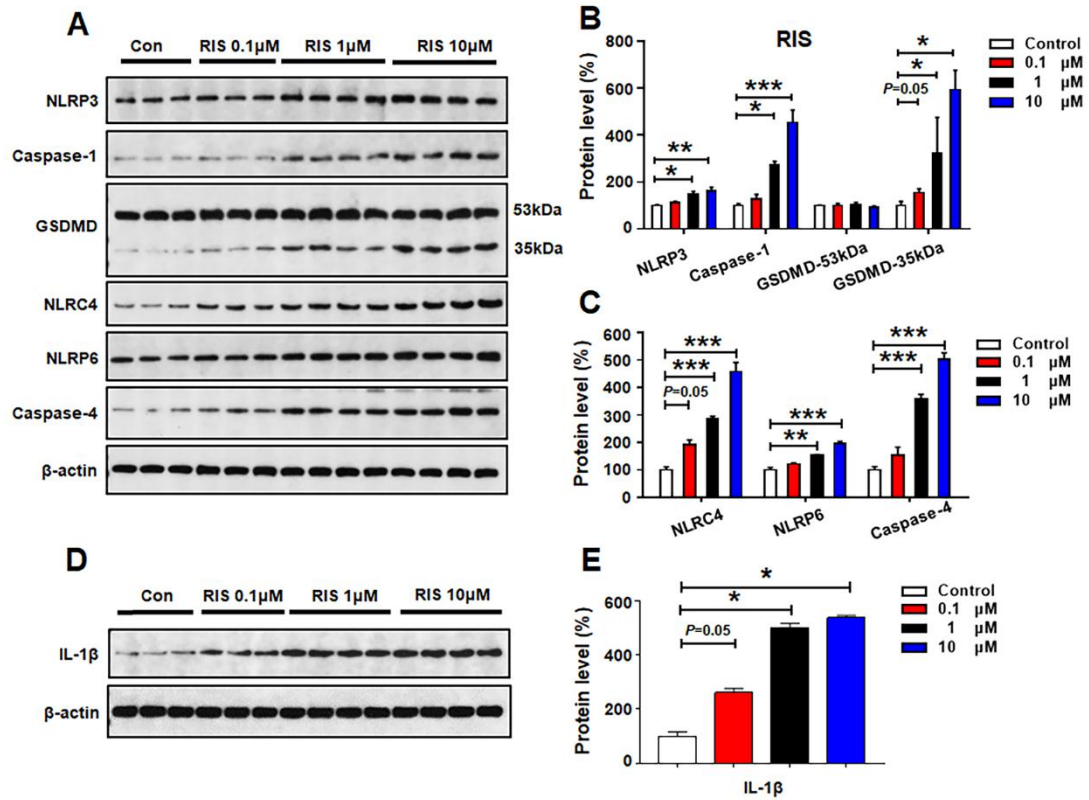

### 5.1 RIS-NLRP3

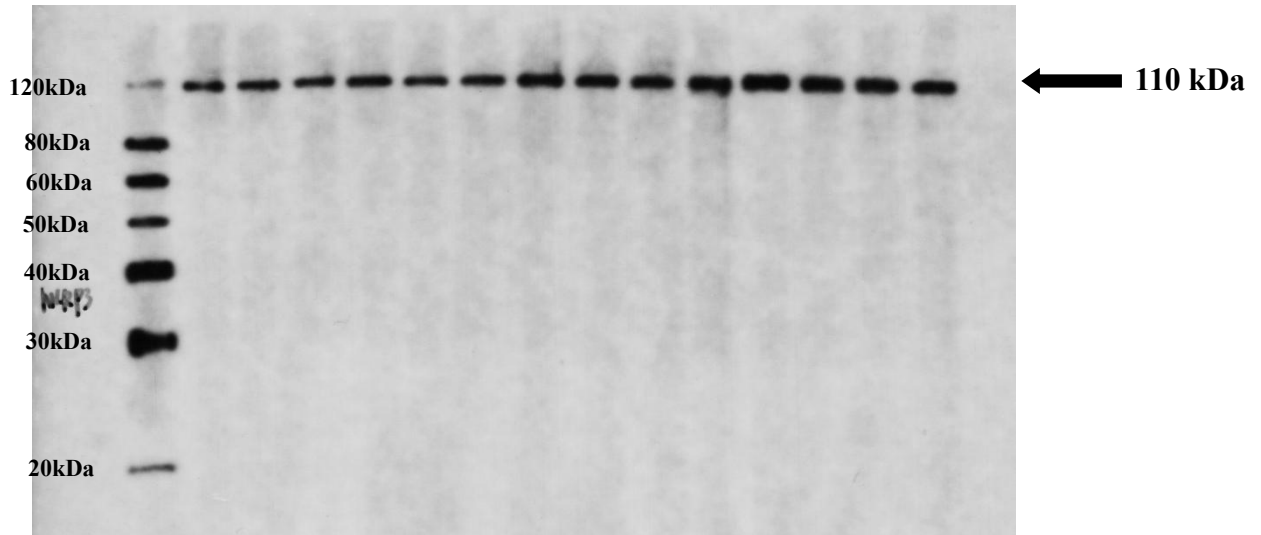

## 5.2 RIS-Caspase1

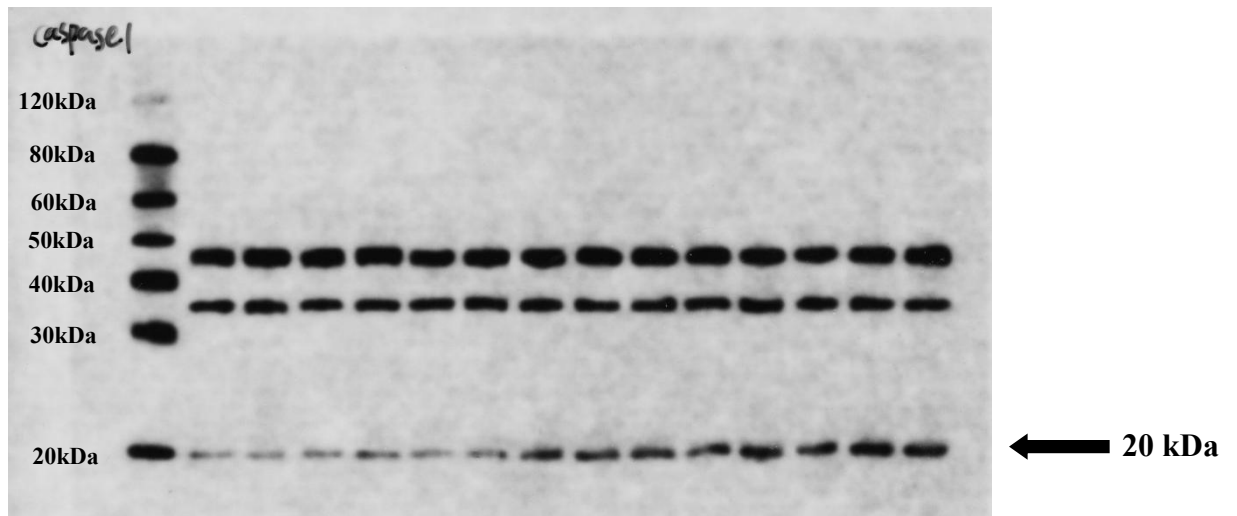

## 5.3 RIS-GSDMD

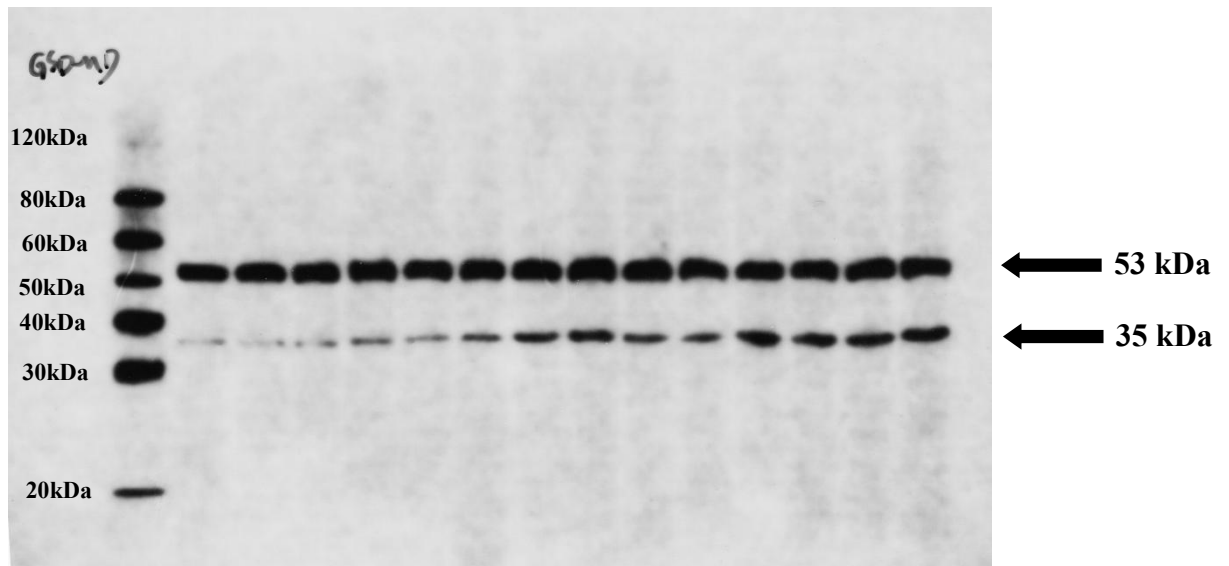

## 5.4 RIS-NLRC4

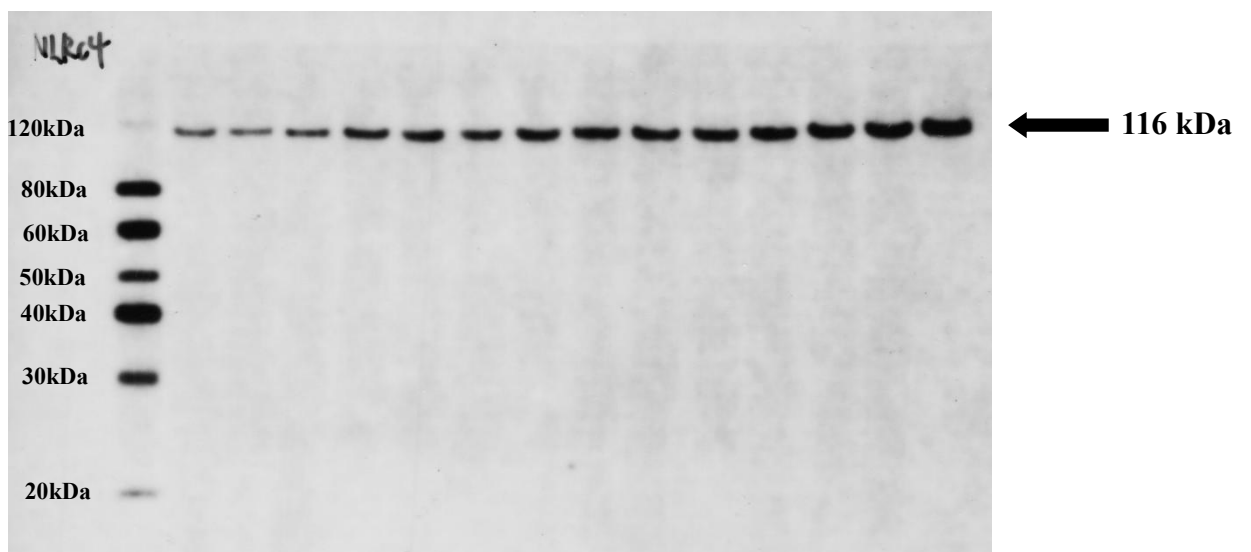

5.5 RIS-NLRP6

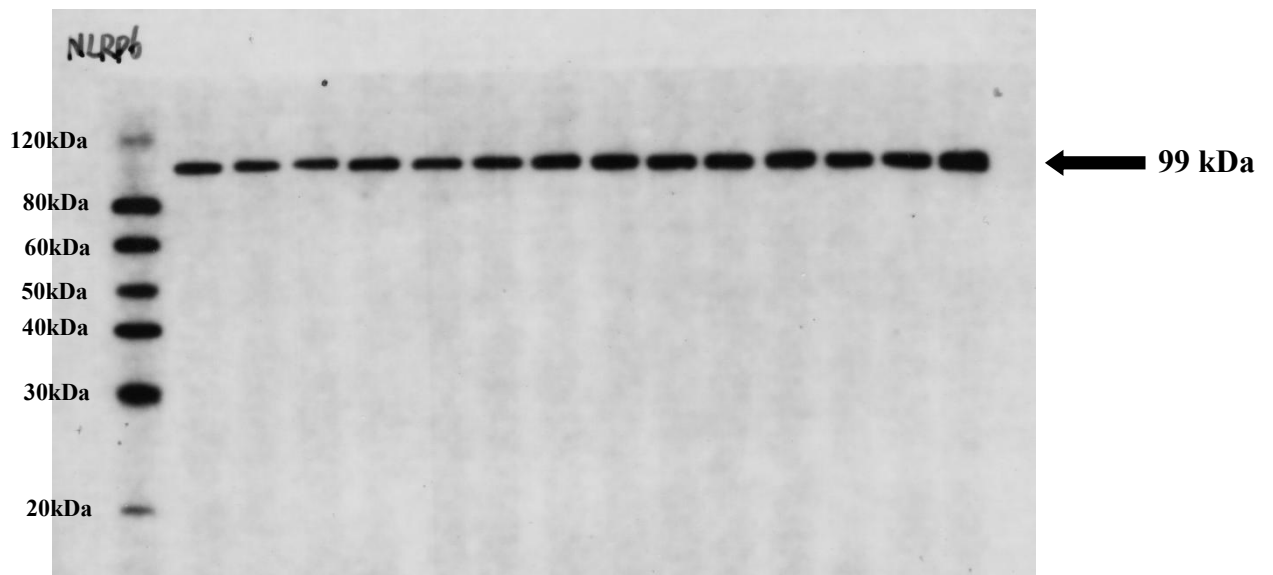

5.6 RIS-Caspase4

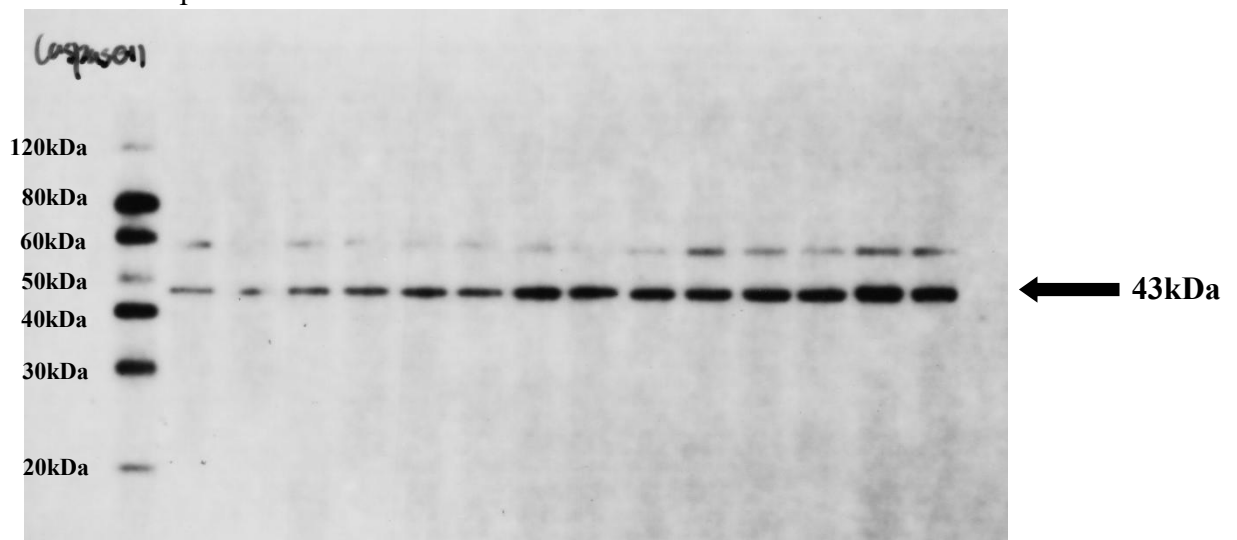

5.7 RIS-Actin

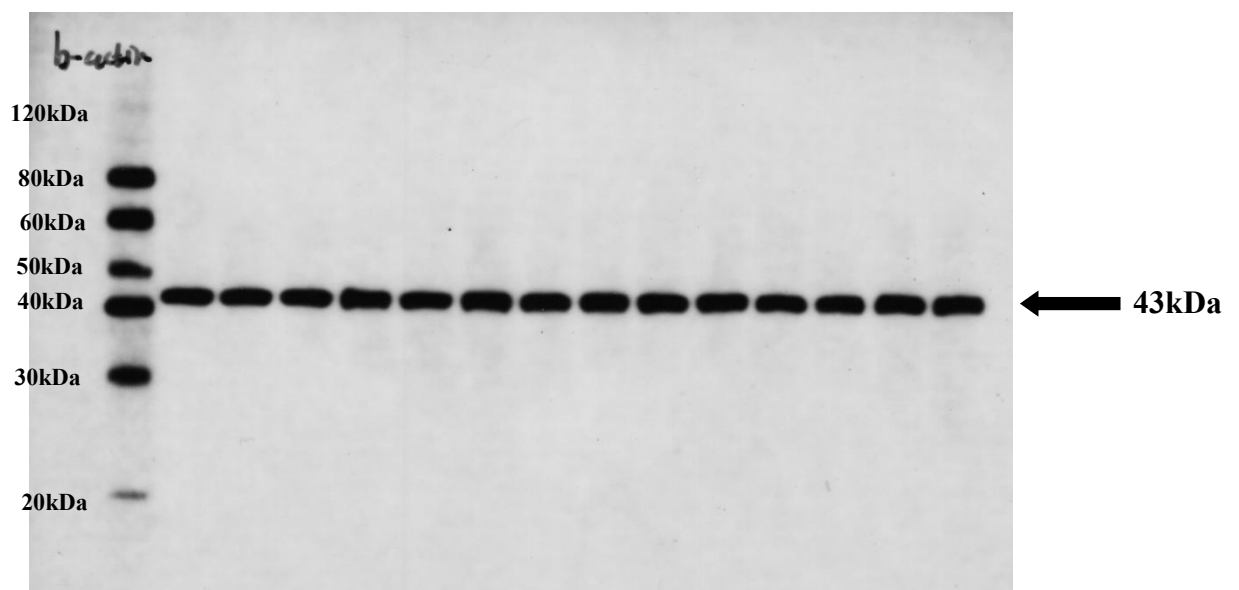

### 5.8 RIS-IL-1 $\beta$

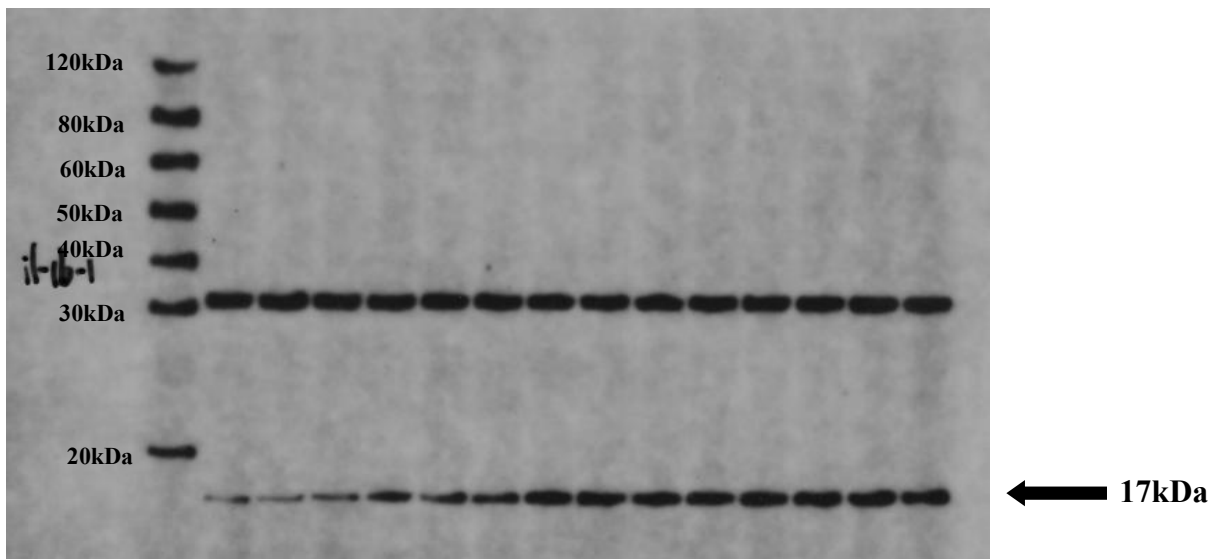

### 5.9 RIS- $\beta$ -actin

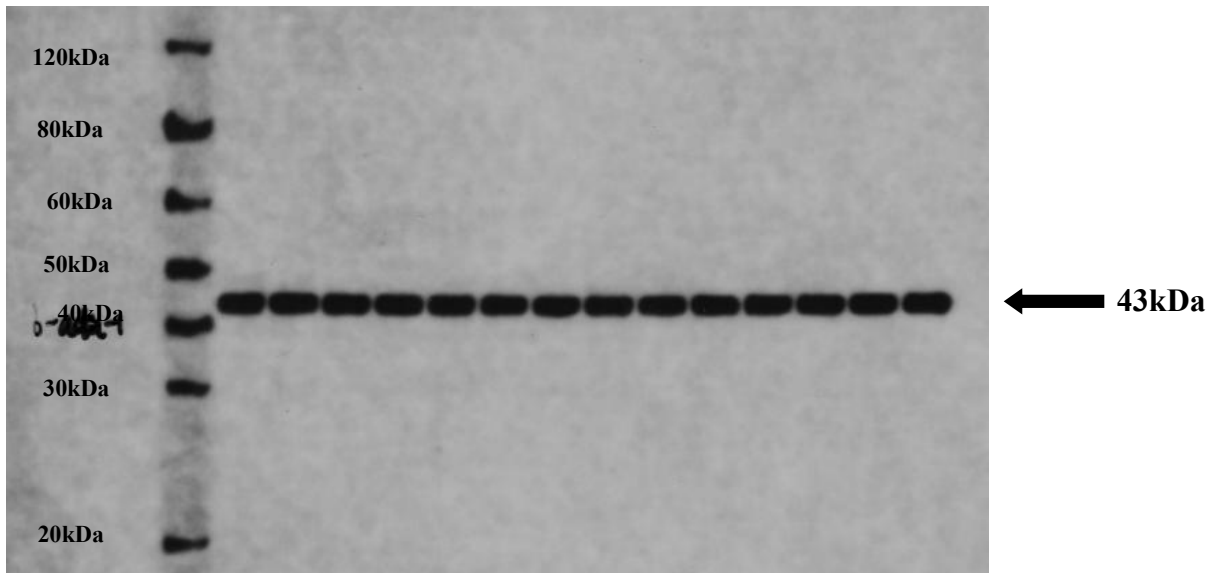

## 6. Supplementary figure 6. Original images in figure 5A and D

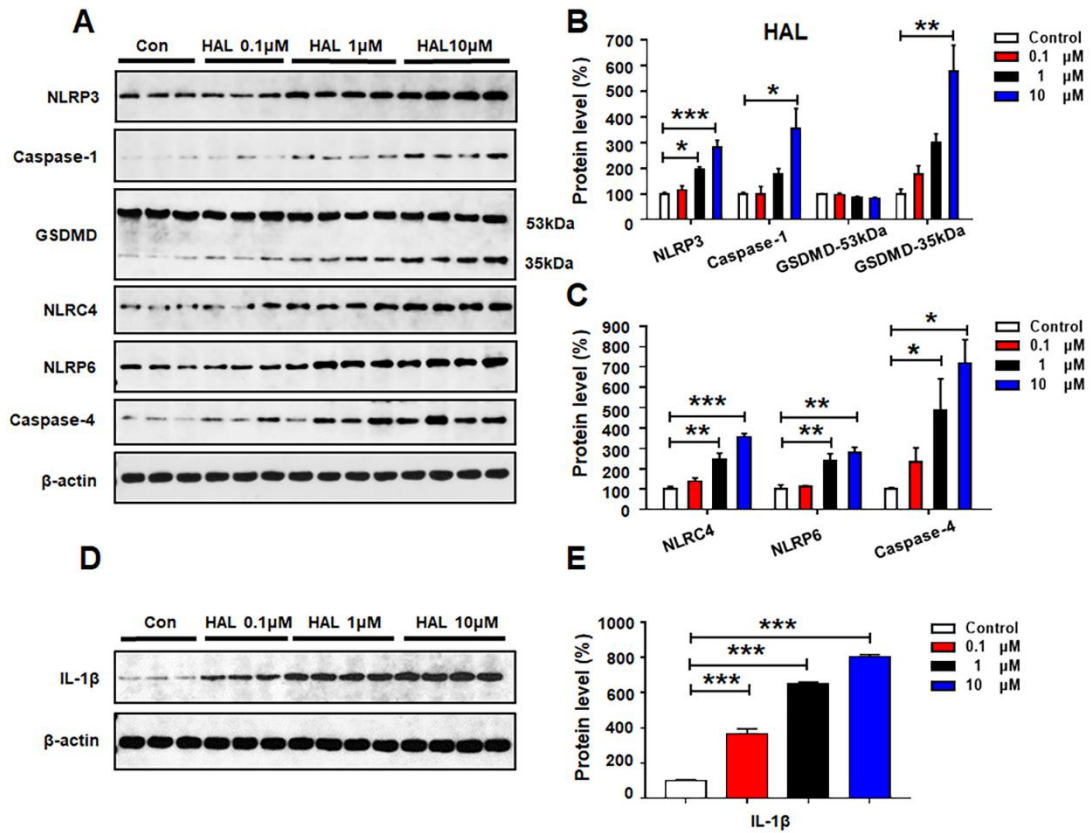

### 6.1 HAL-NLRP3

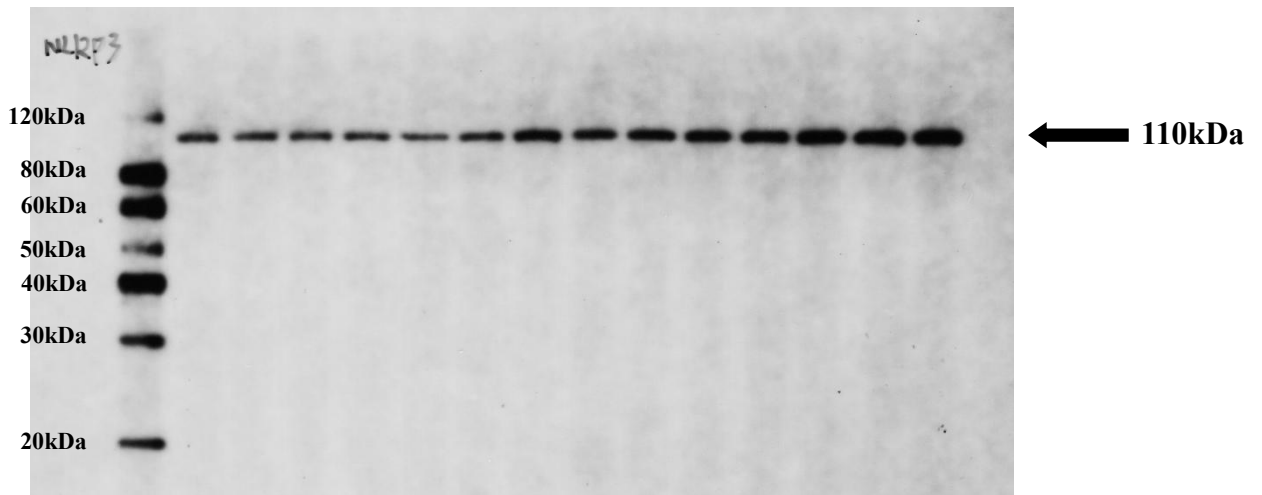

### 6.2 HAL-Caspase1

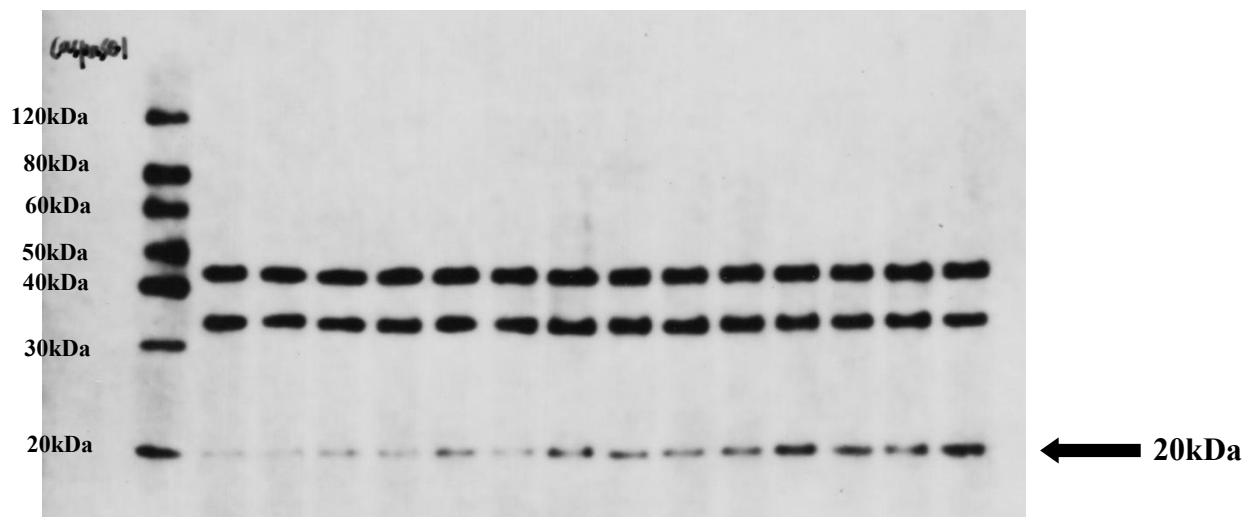

### 6.3 HAL-GSDMD

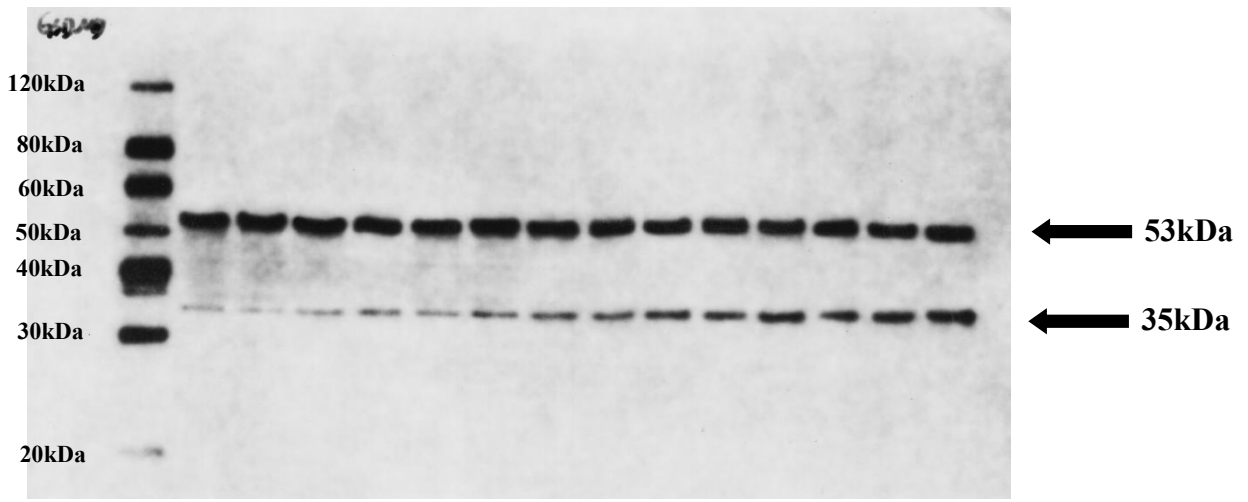

### 6.4 HAL-NLRC4

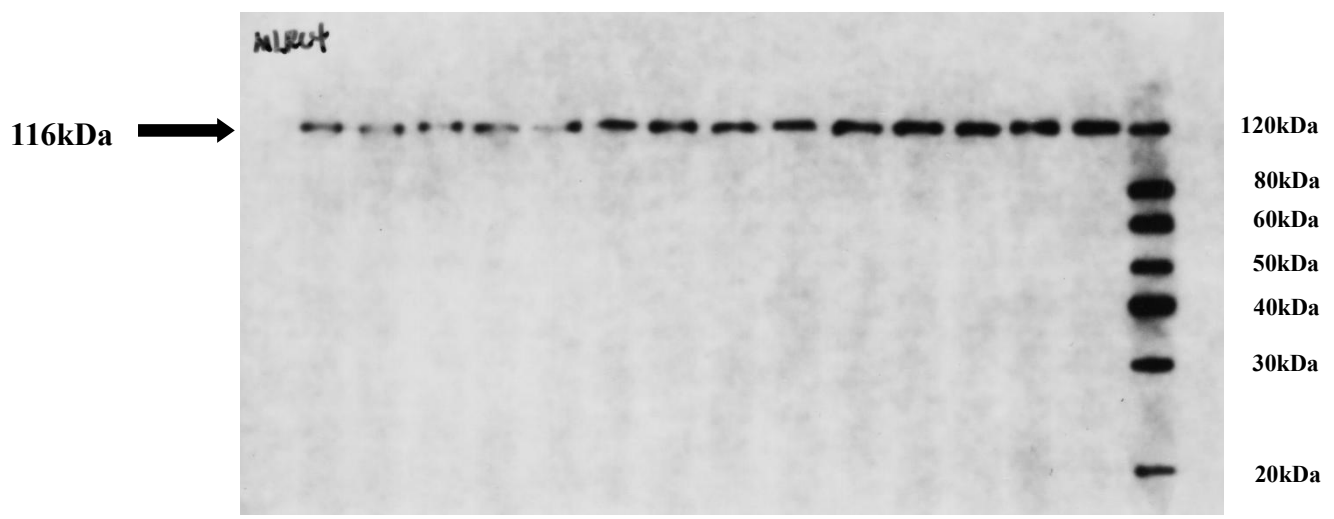



**6.5 HAL-NLRP6**

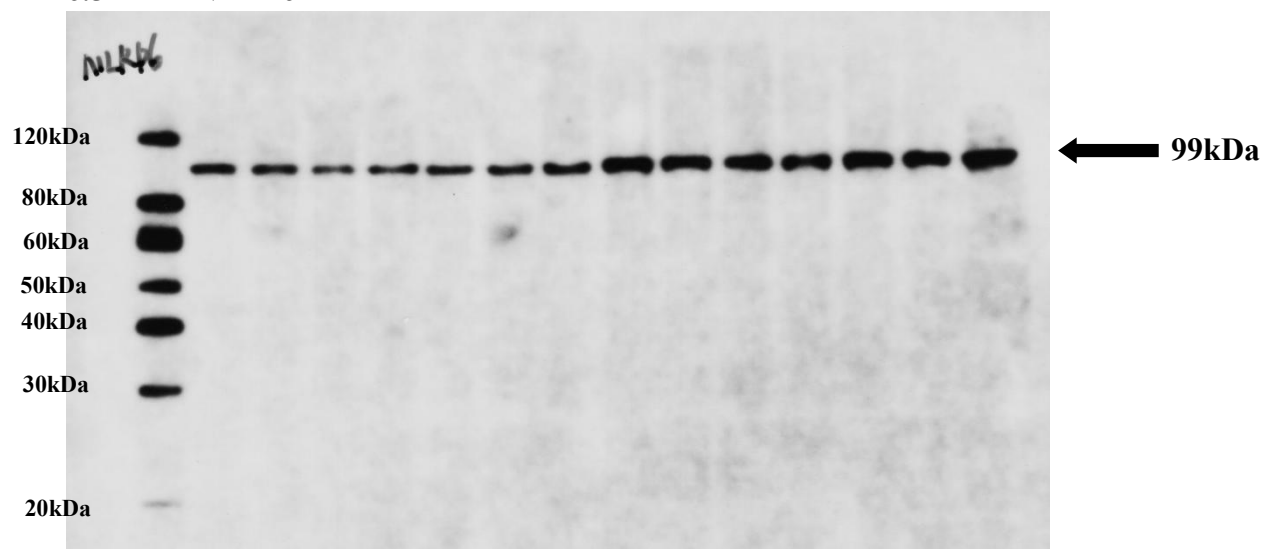

**6.6 HAL-Caspase4**

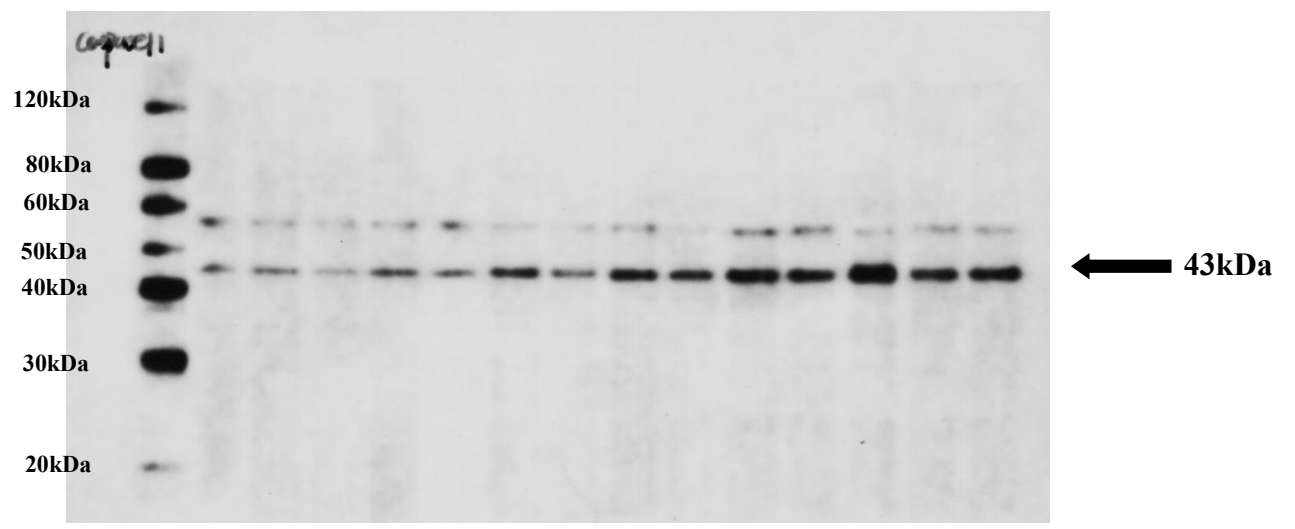

**6.7 HAL-β-actin**

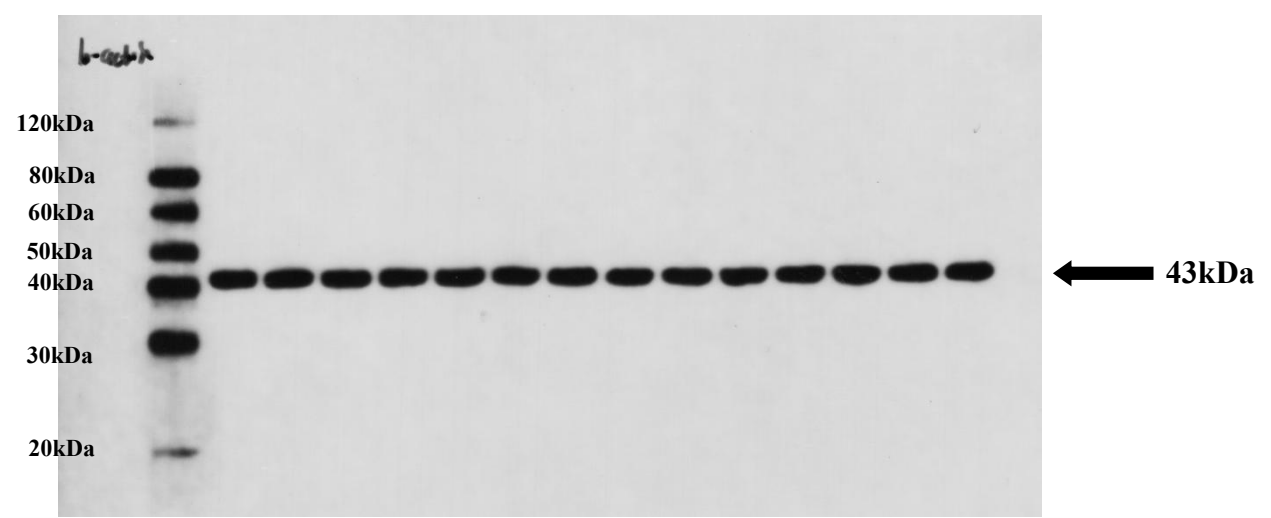

### 6.8 HAL-IL-1 $\beta$

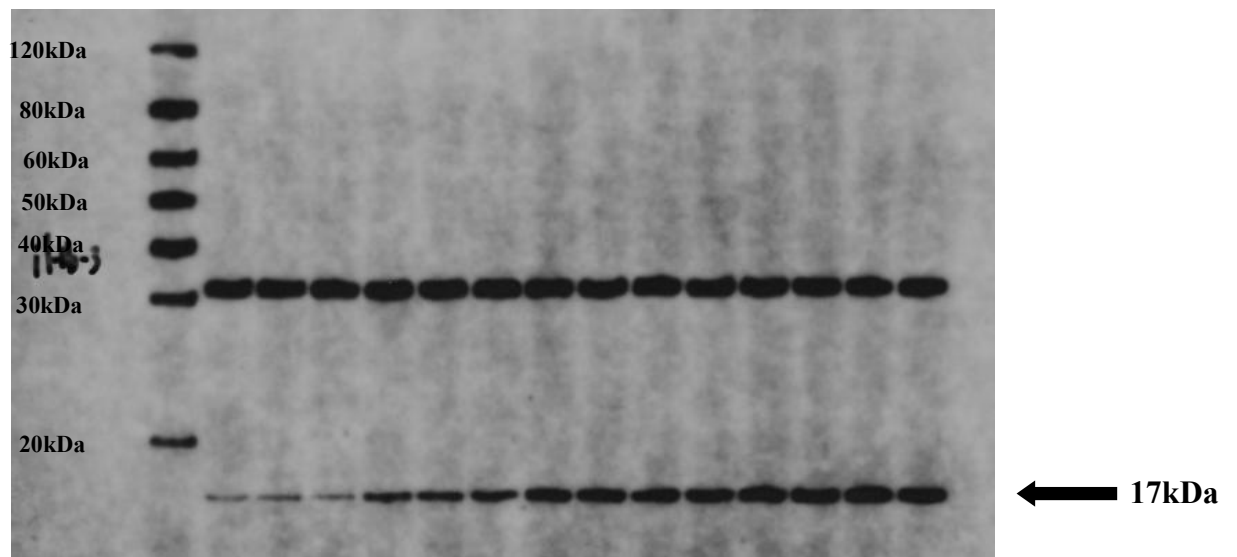

### 6.9 HAL- $\beta$ -actin

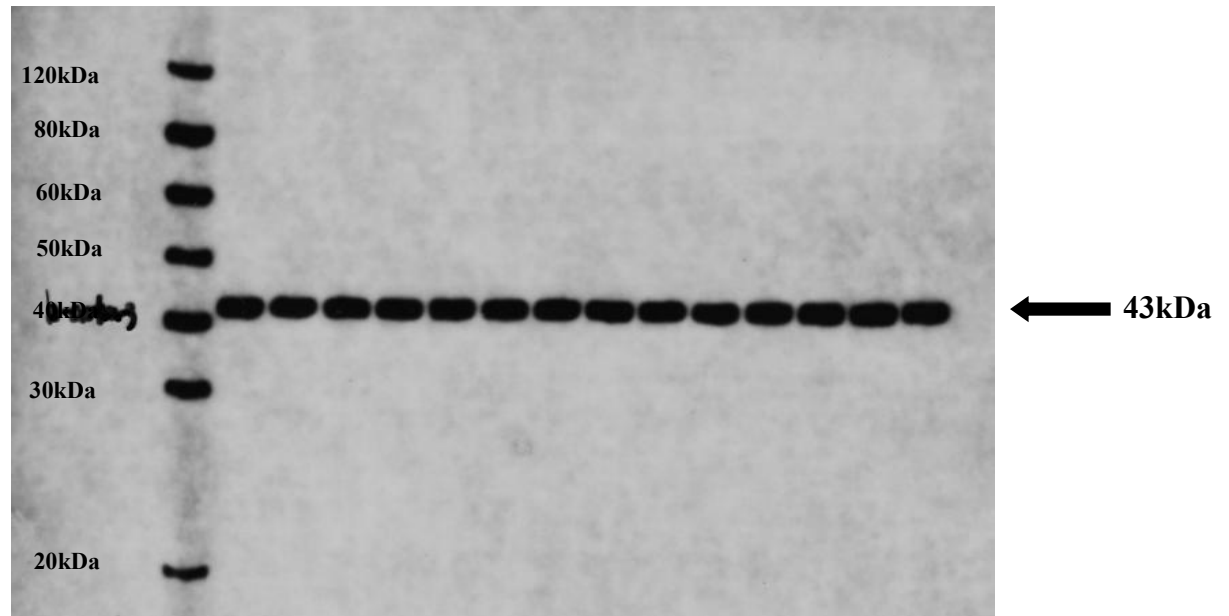

## 7. Supplementary figure 7. Original images in figure 6A and E

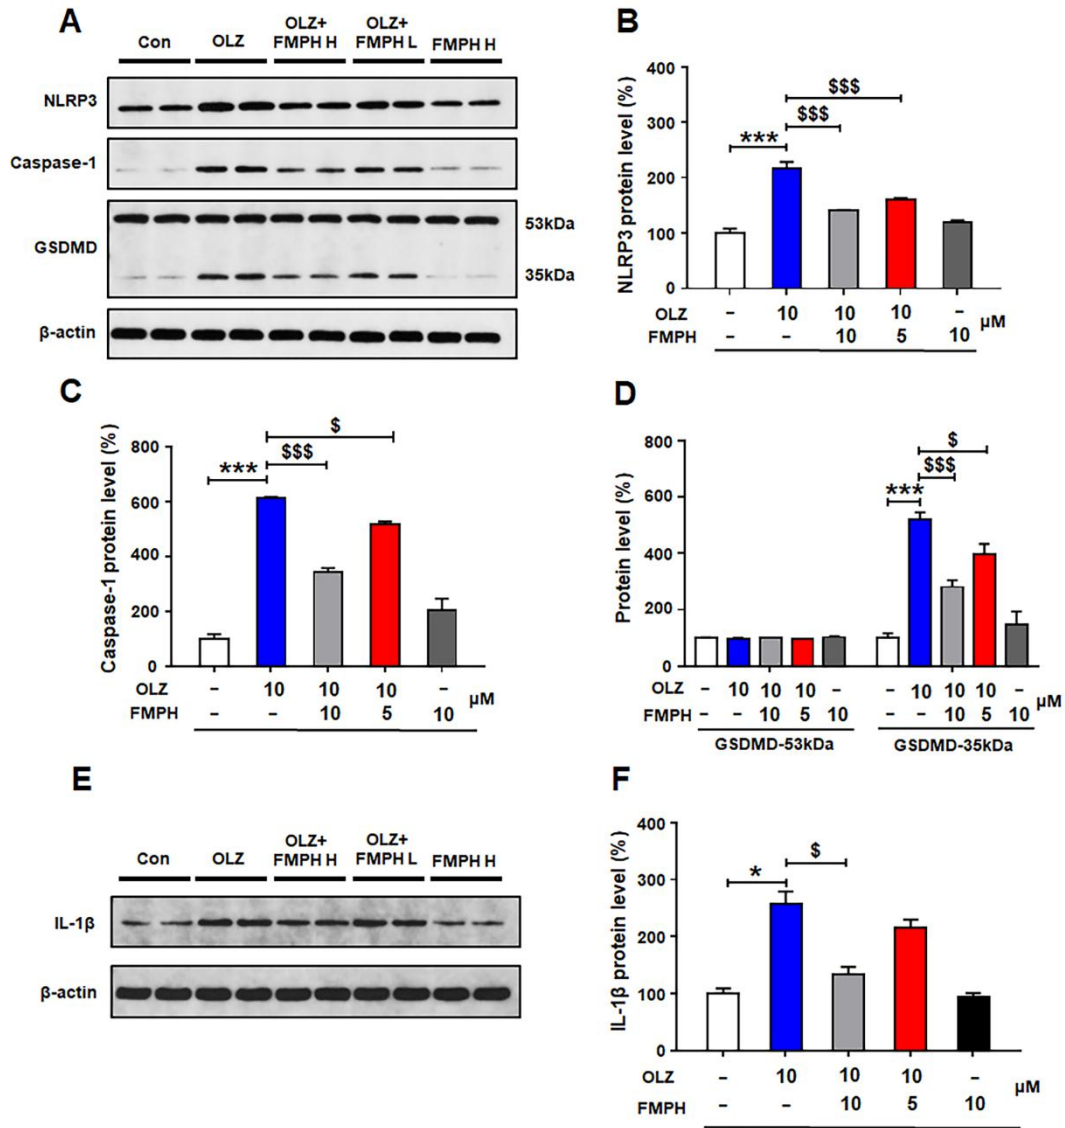

### 7.1 OLZ+FMPH-NLRP3

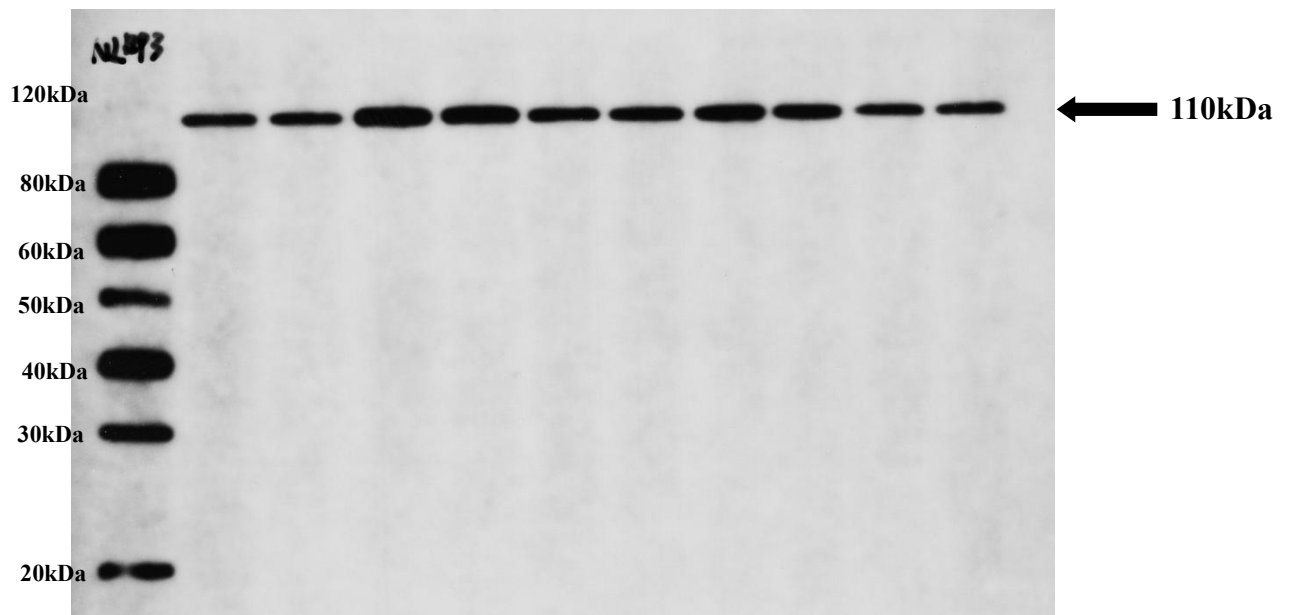

### 7.2 OLZ+FMPH-Caspase-1

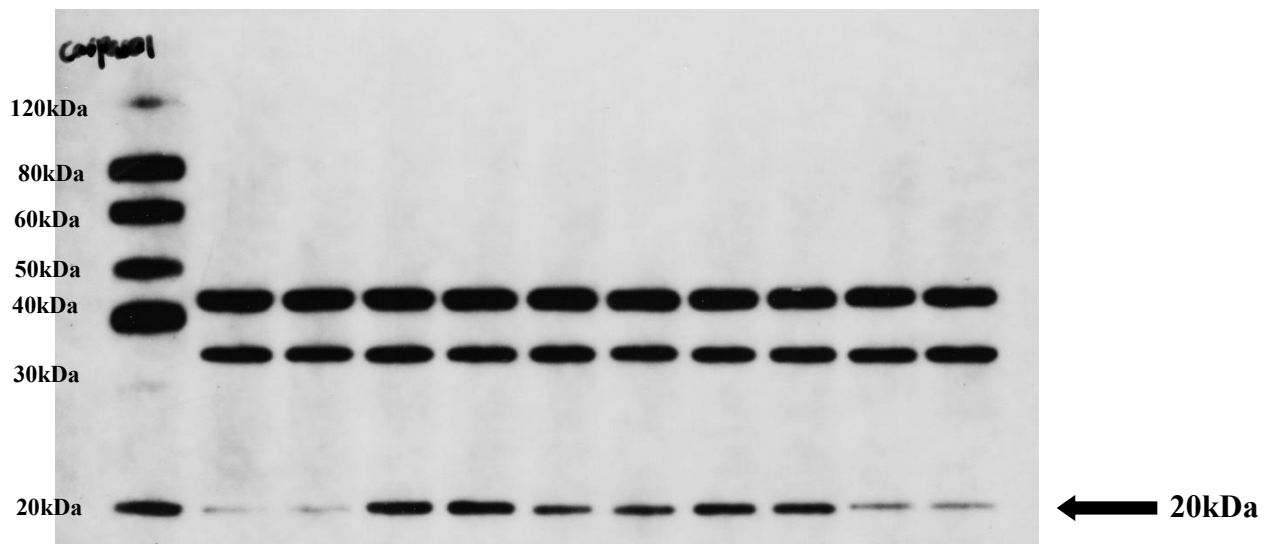

### 7.3 OLZ+FMPH-GSDMD

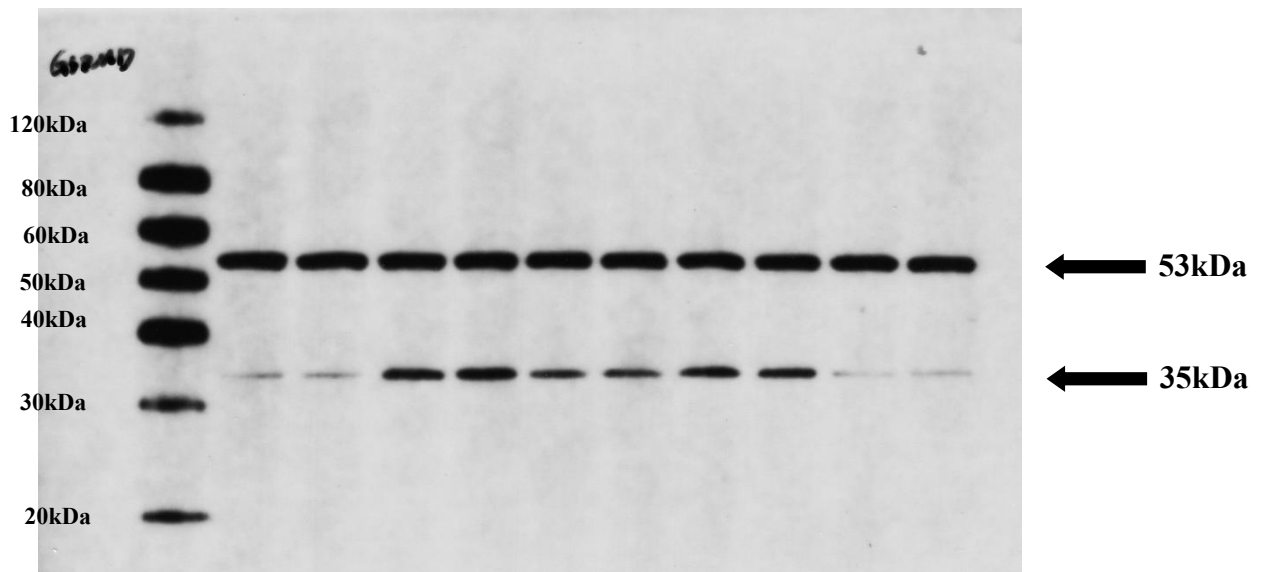

### 7.4 OLZ+FMPH-β-actin

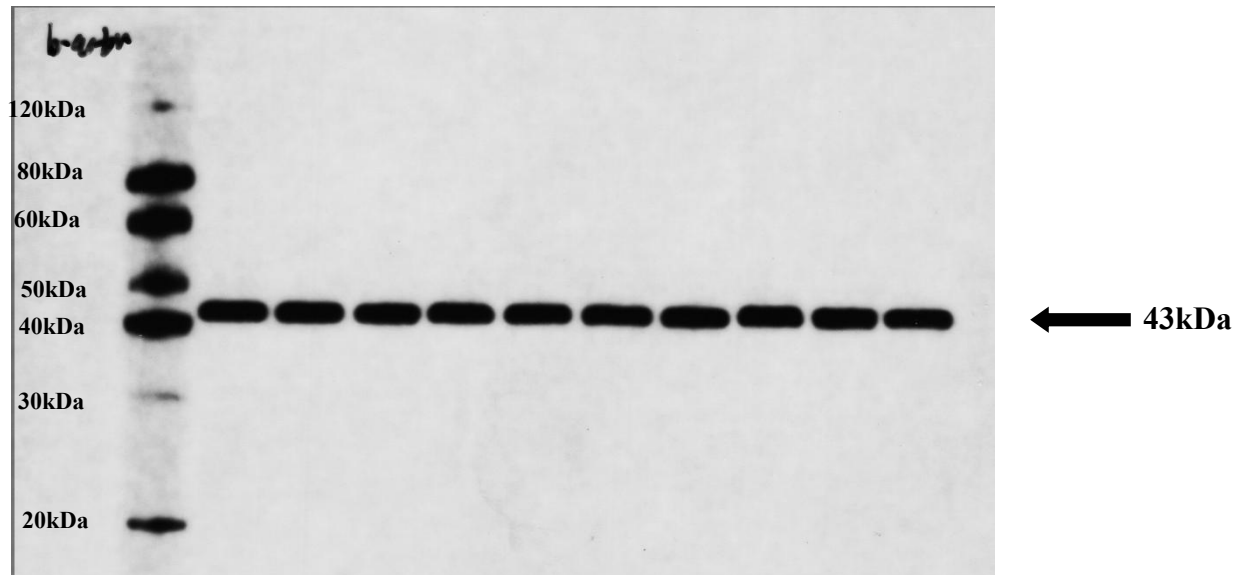

**7.5 OLZ+FMPH-IL-1 $\beta$**

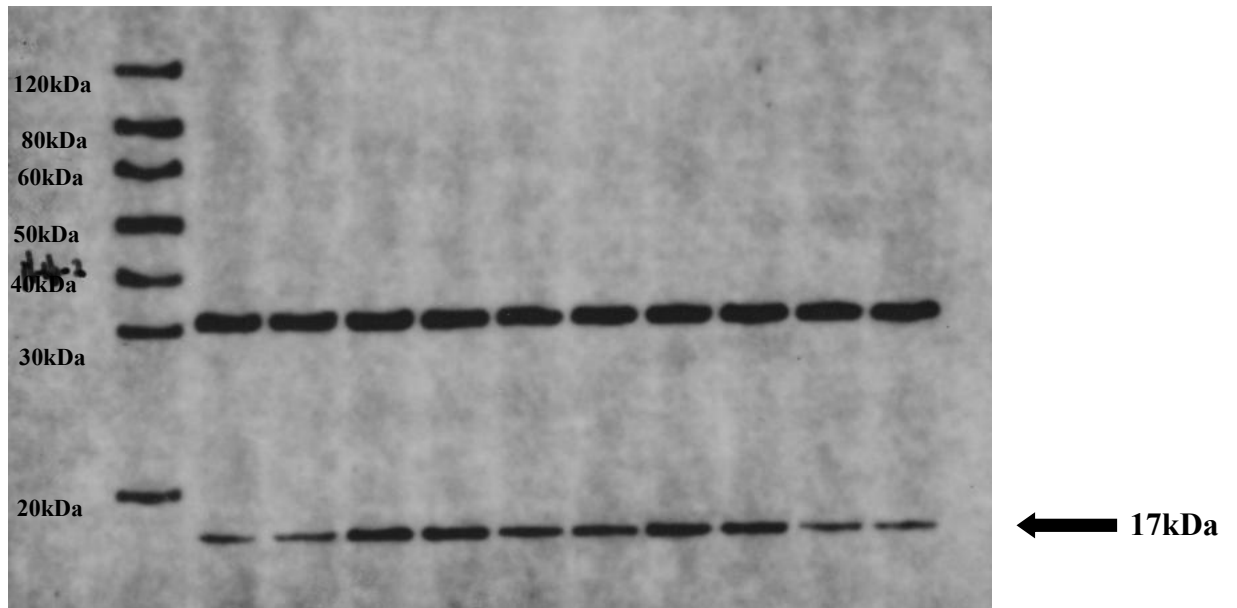

**7.6 OLZ+FMPH- $\beta$ -actin**

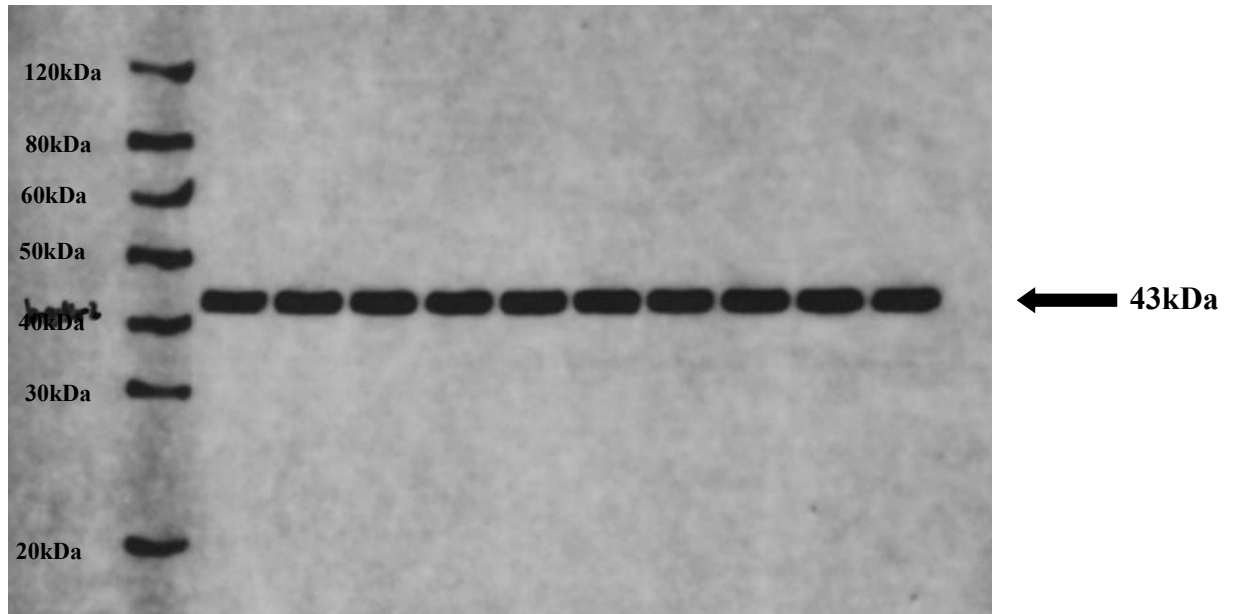

### 8. Supplementary figure 8. Original images in figure 7A and E

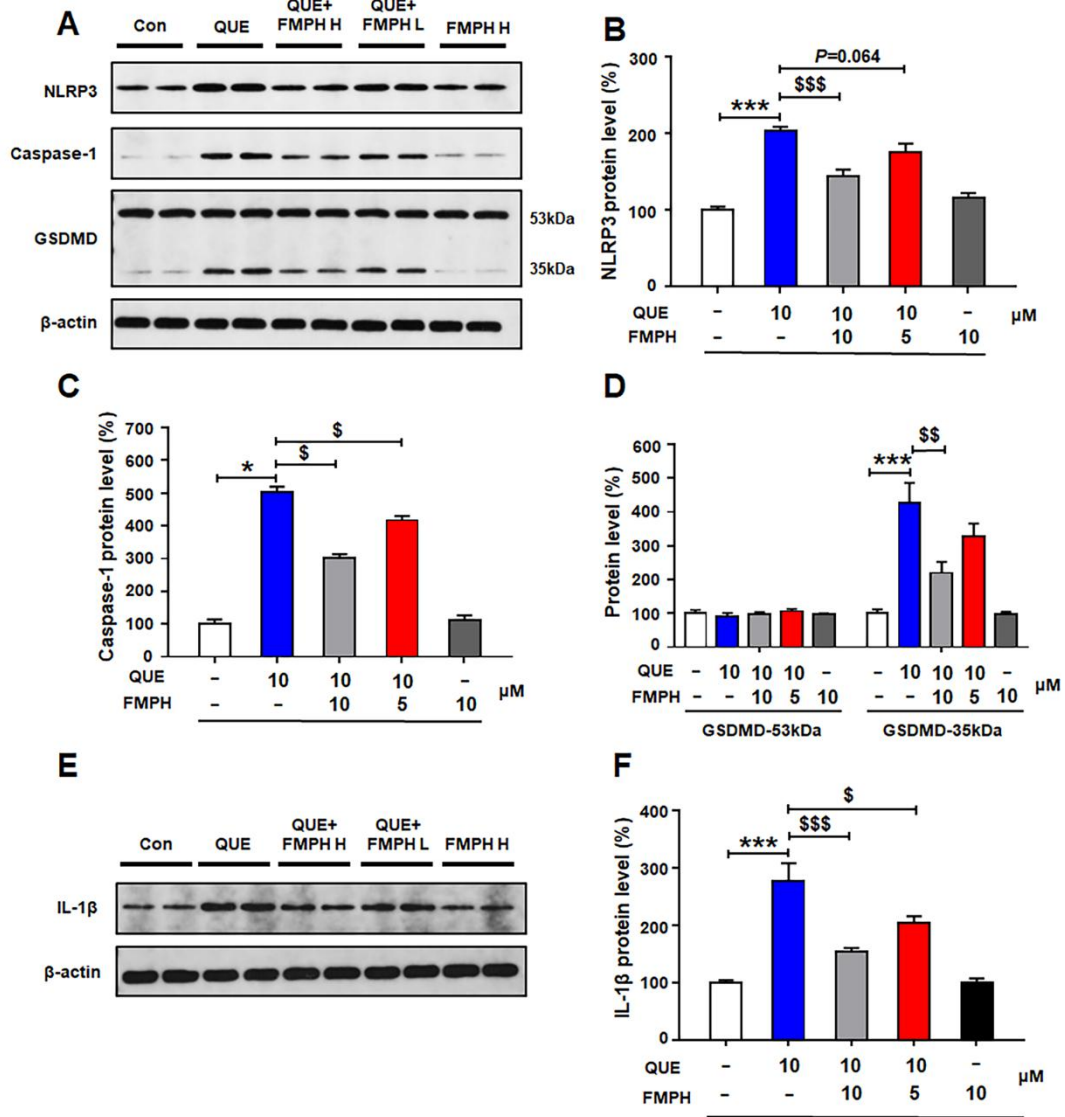

### 8.1 QUE+FMPH-NLRP3

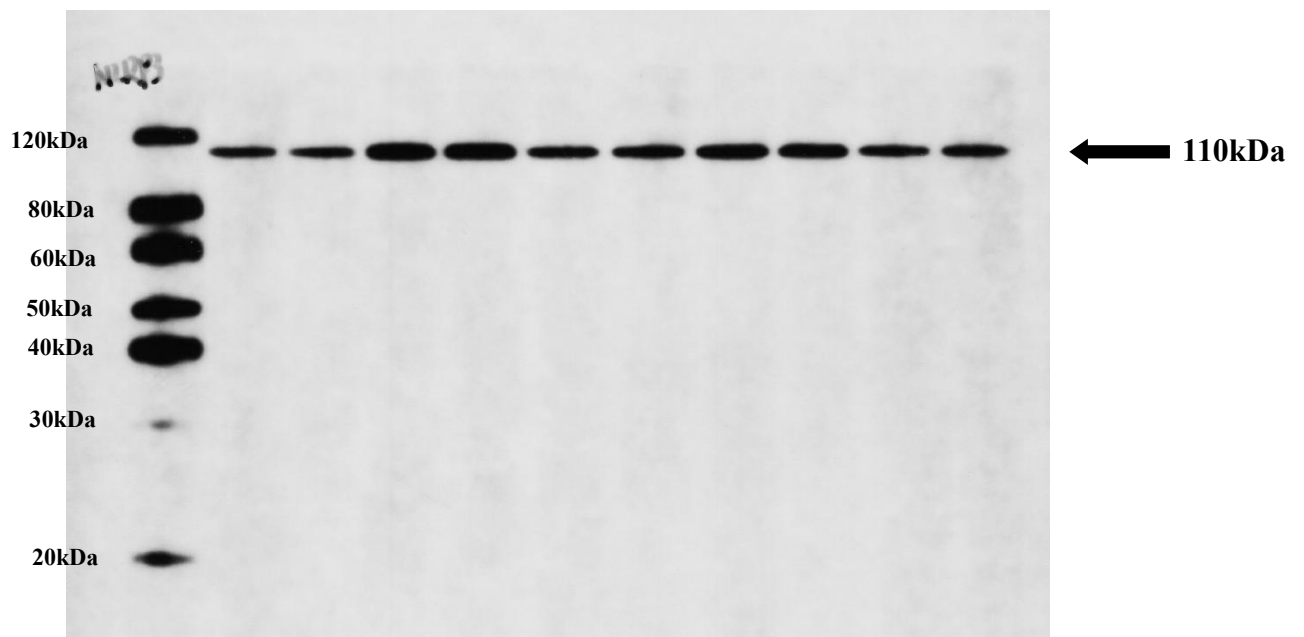

### 8.2 QUE+FMPH-Caspase-1

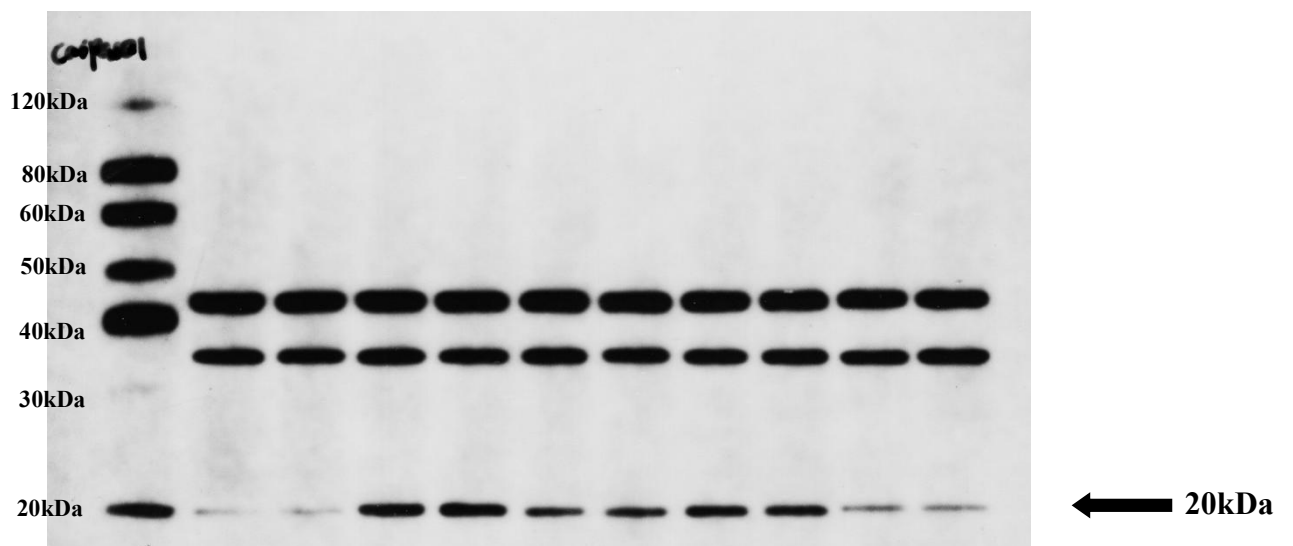



### 8.3 QUE+FMPH-GSDMD

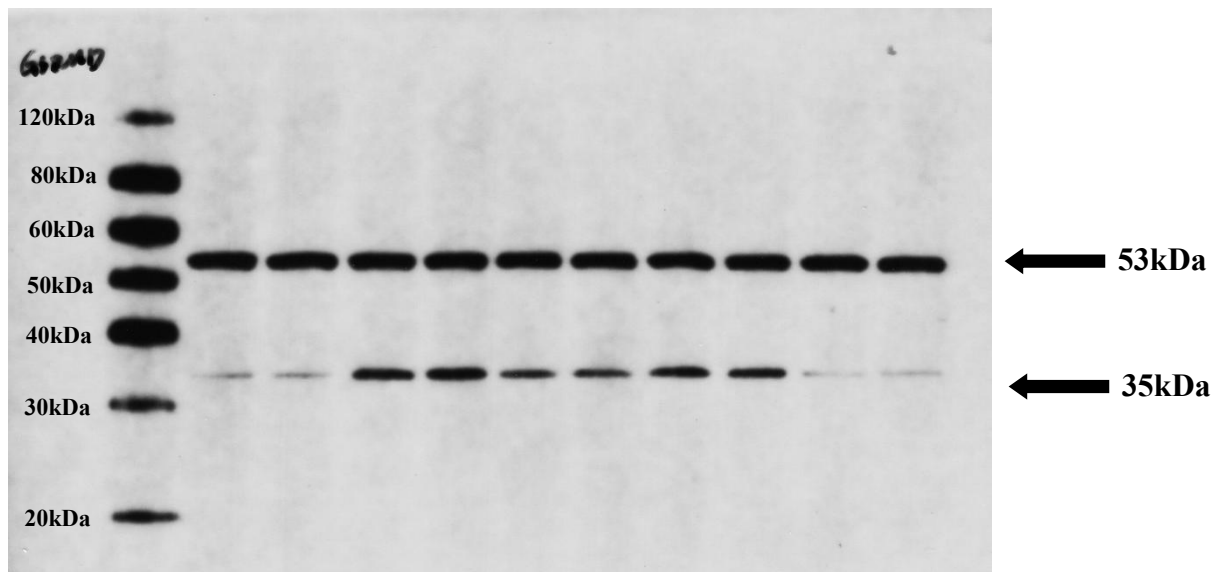

### 8.4 QUE+FMPH- $\beta$ -actin

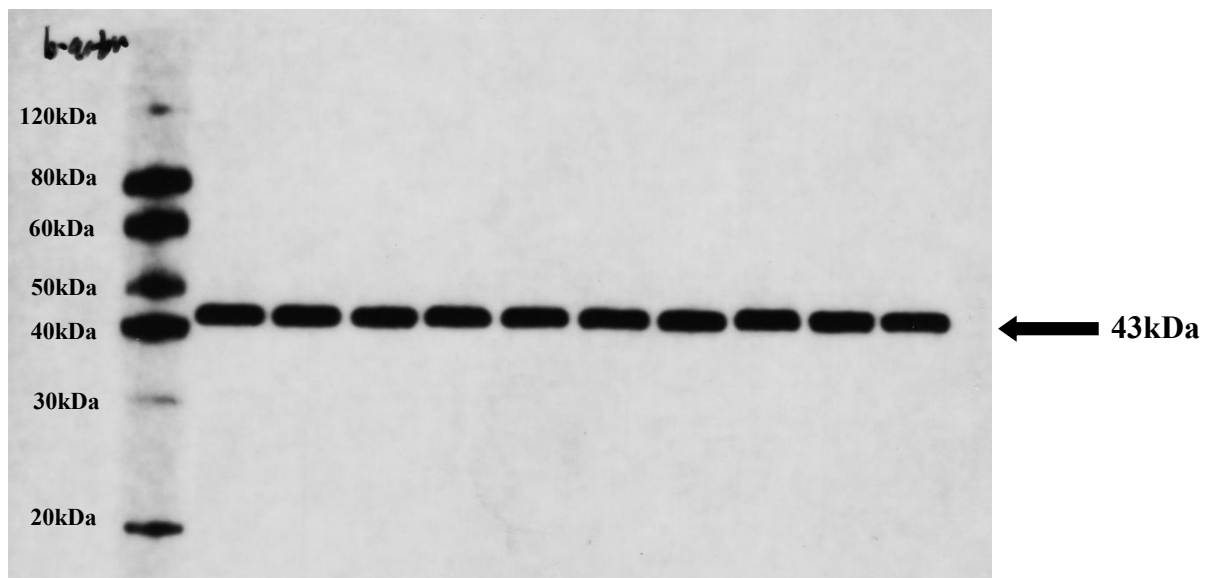

### 8.5 QUE+FMPH-IL-1 $\beta$

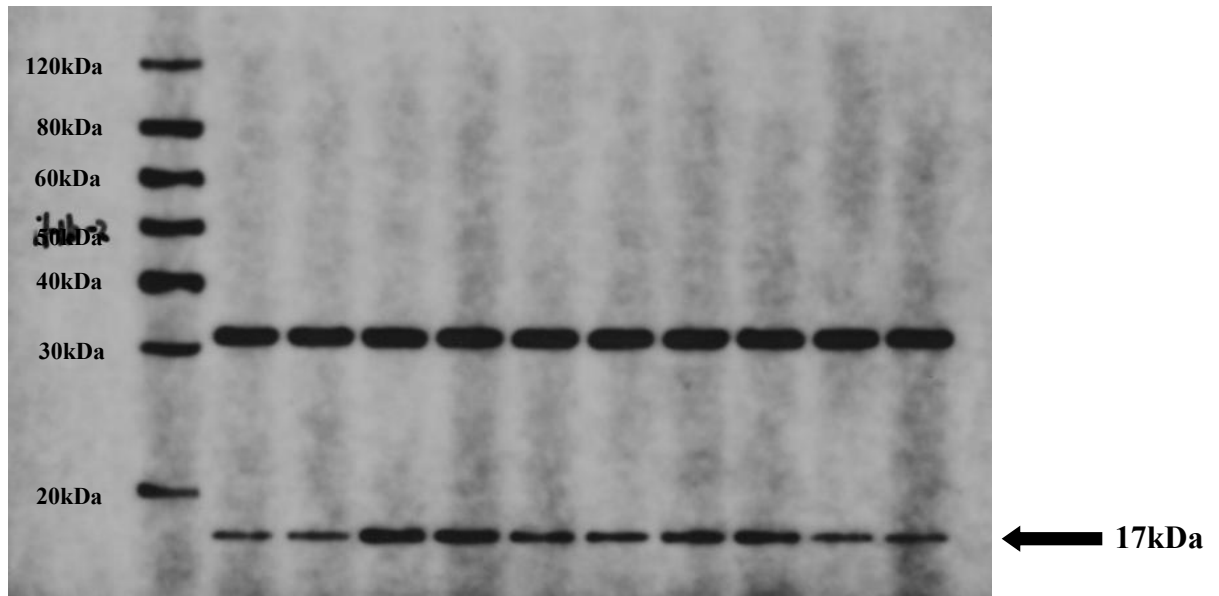

### 8.6 QUE+FMPH- $\beta$ -actin

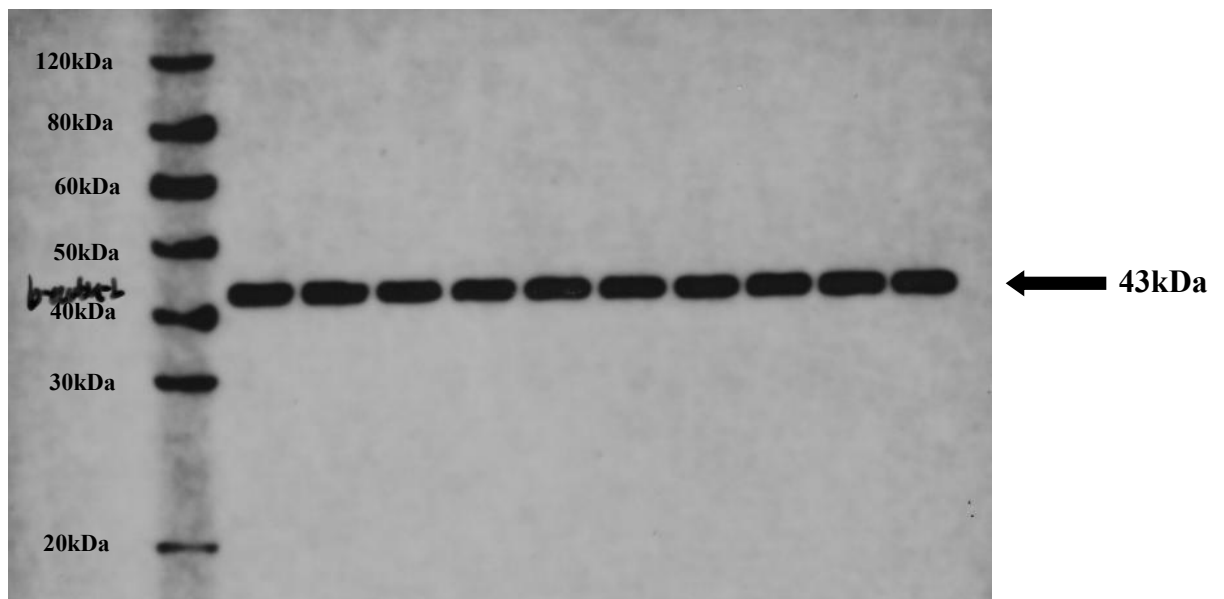

## 9. Supplementary figure 9. Original images in figure 8A and E

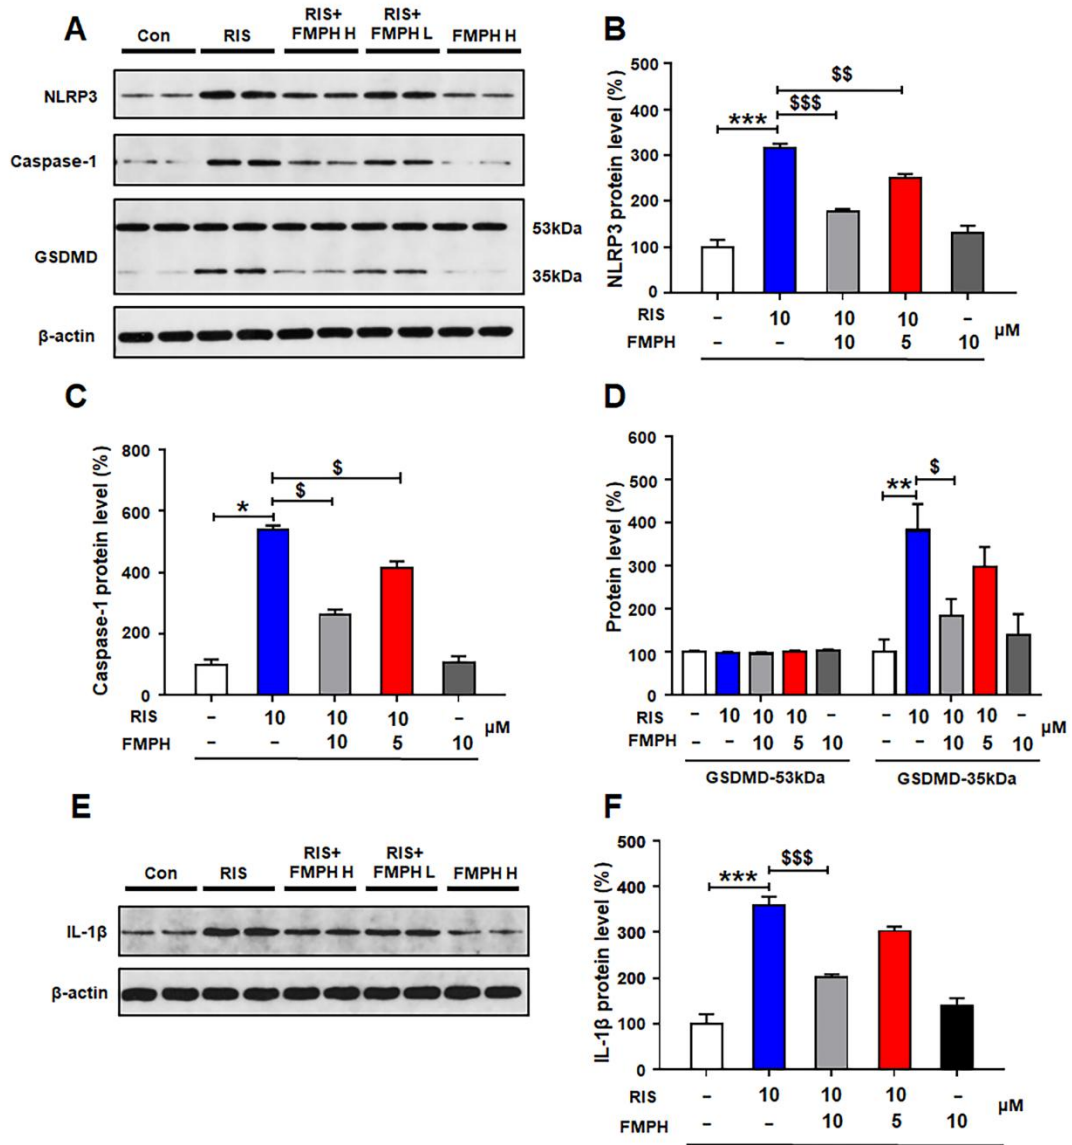

### 9.1 RIS+FMPH-NLRP3

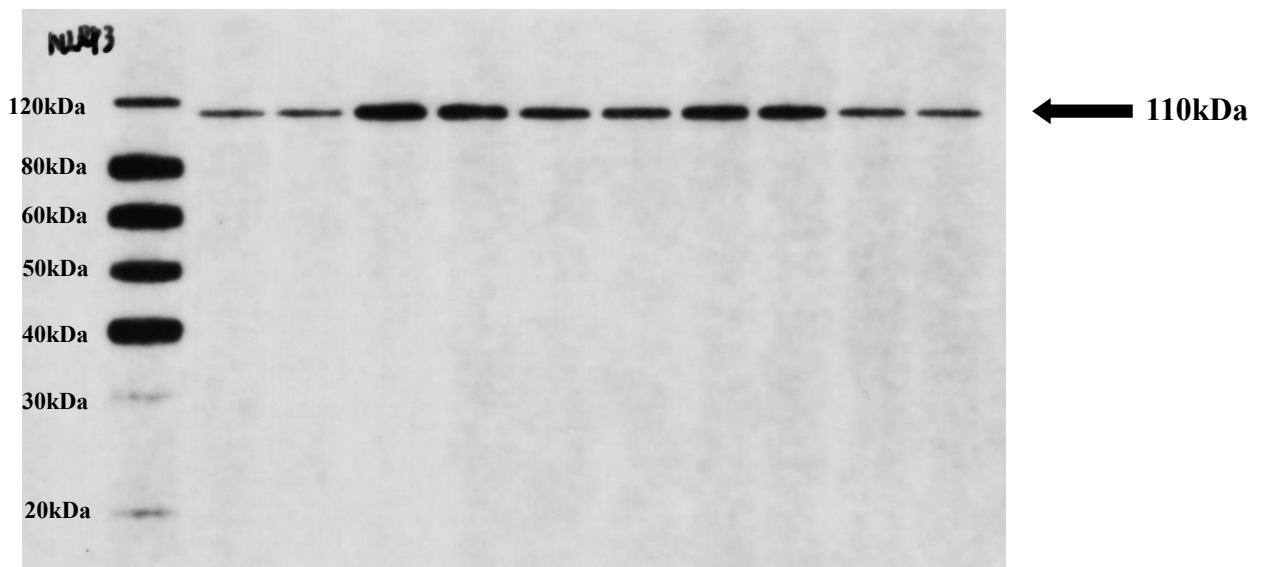

### 9.2 RIS+FMPH-Caspase-1

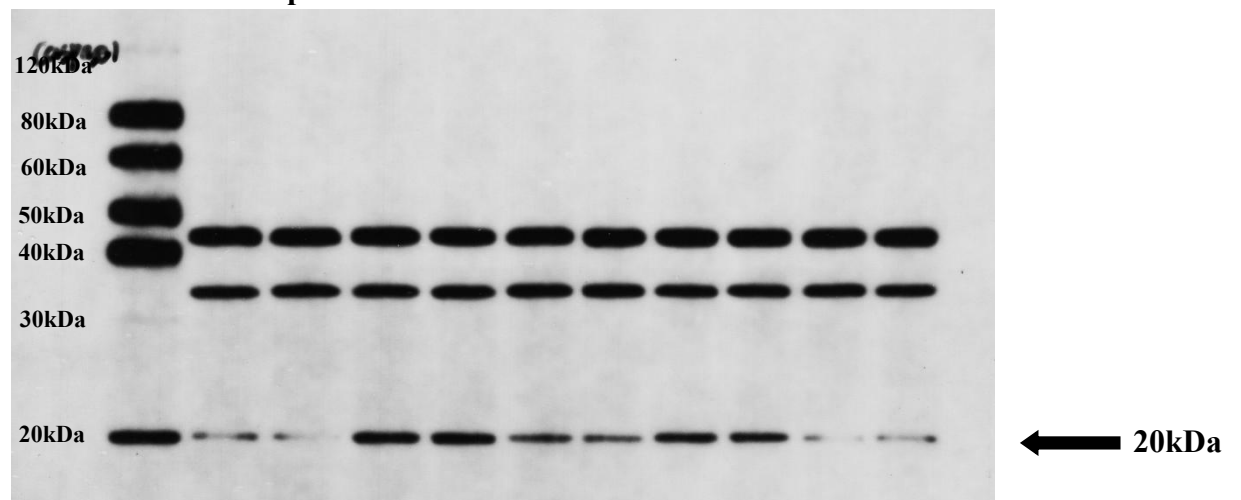

### 9.3 RIS+FMPPH-GSDMD

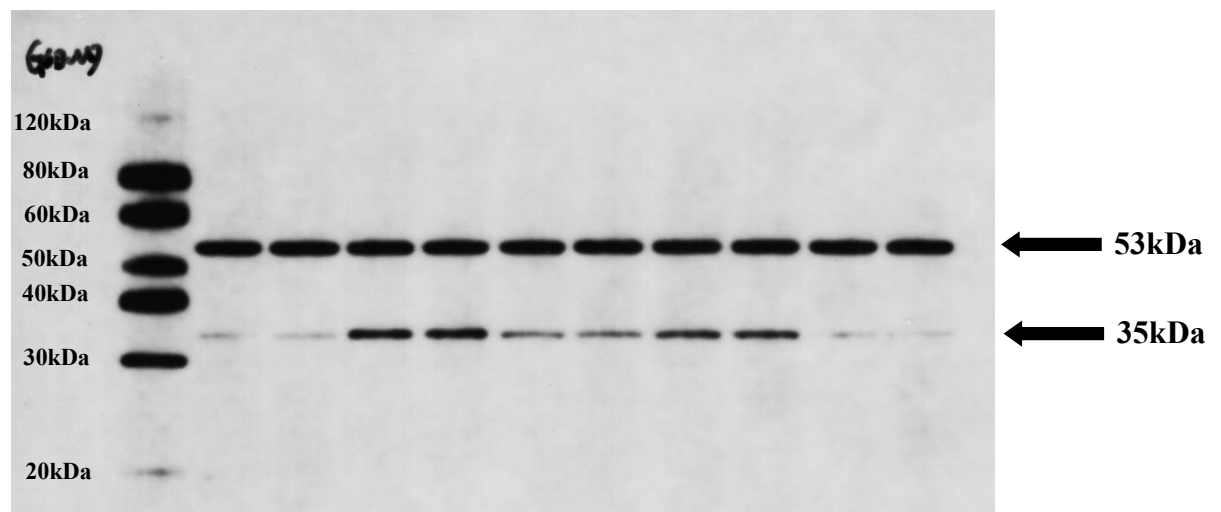

### 9.4 RIS+FMPPH- $\beta$ -actin

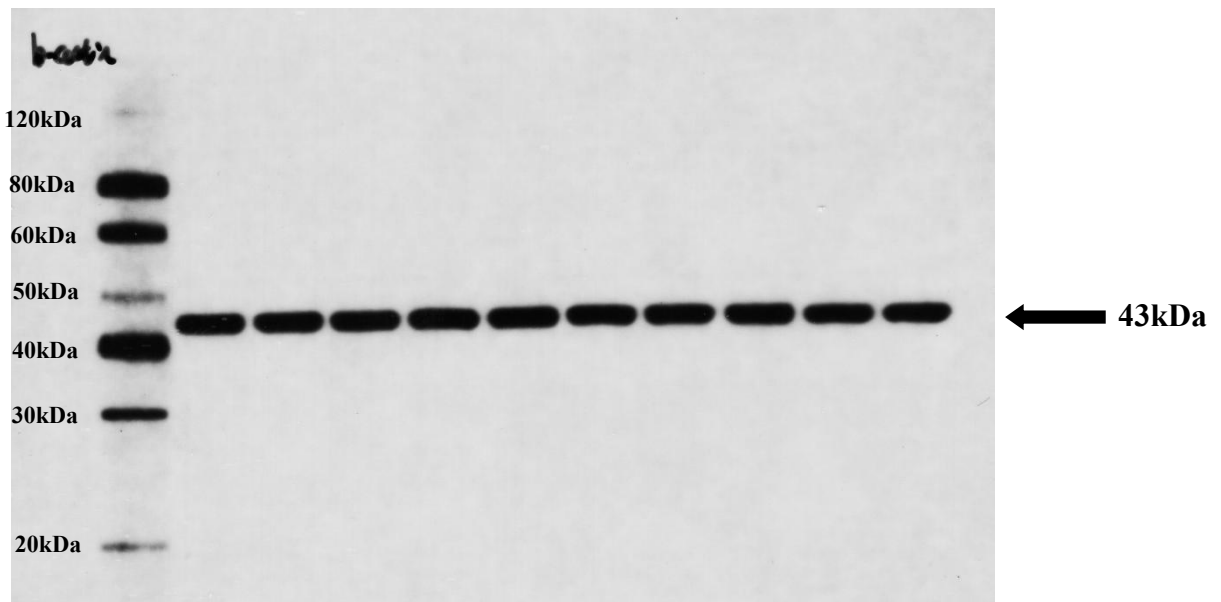

**9.5 RIS+FMPH-IL-1  $\beta$**

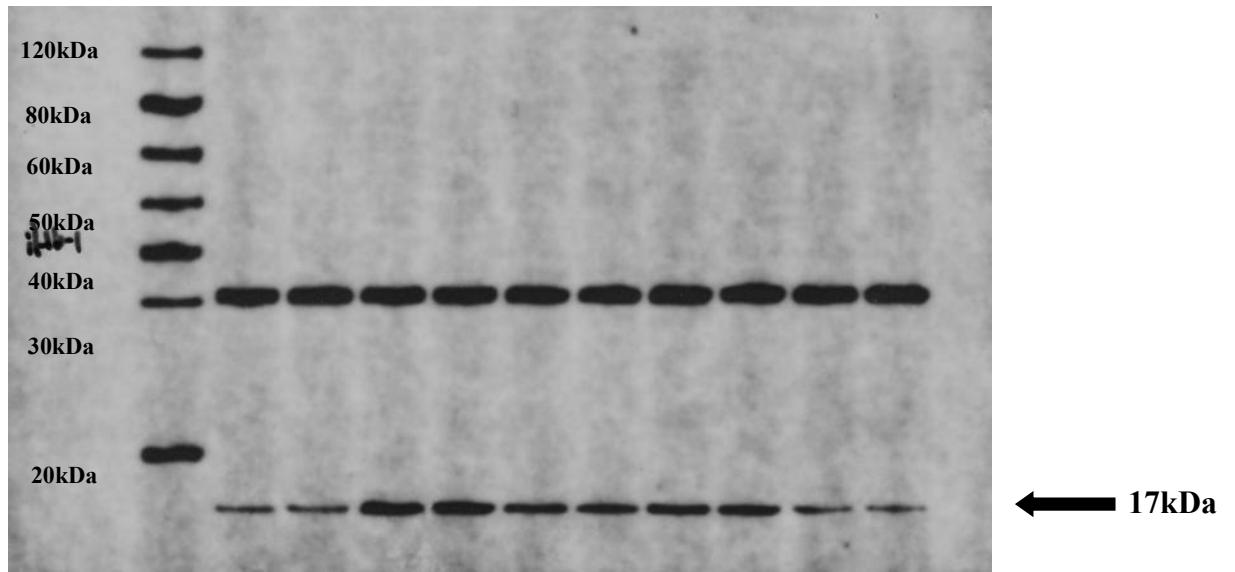

**9.6 RIS+FMPH-  $\beta$ -actin**

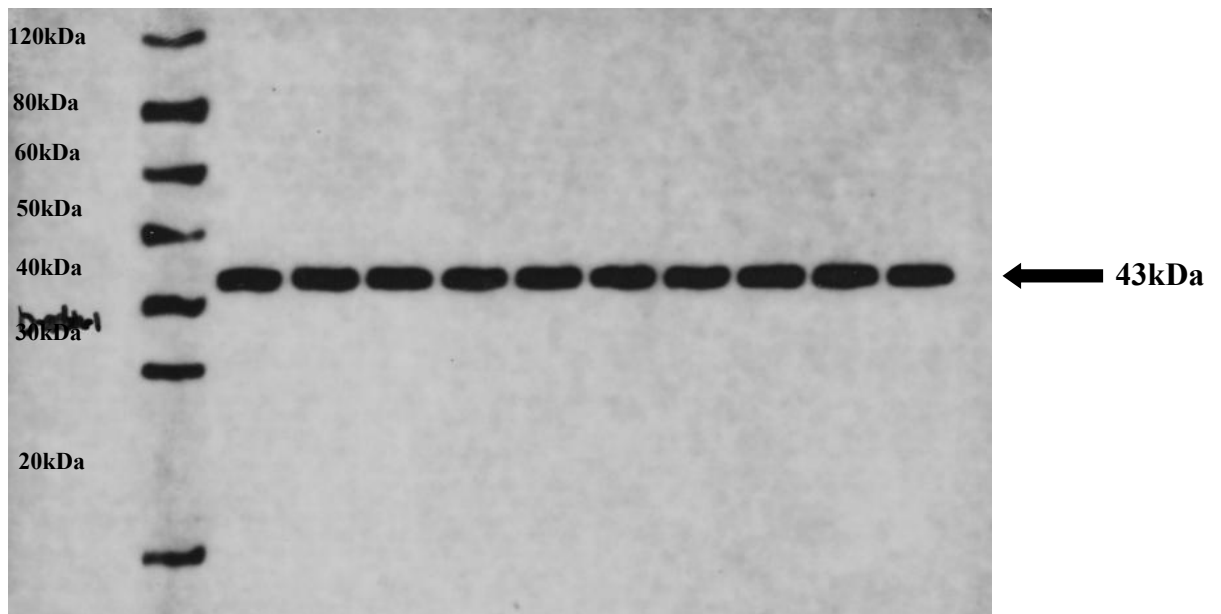

10. Supplementary figure 10. Original images in figure 9A and E

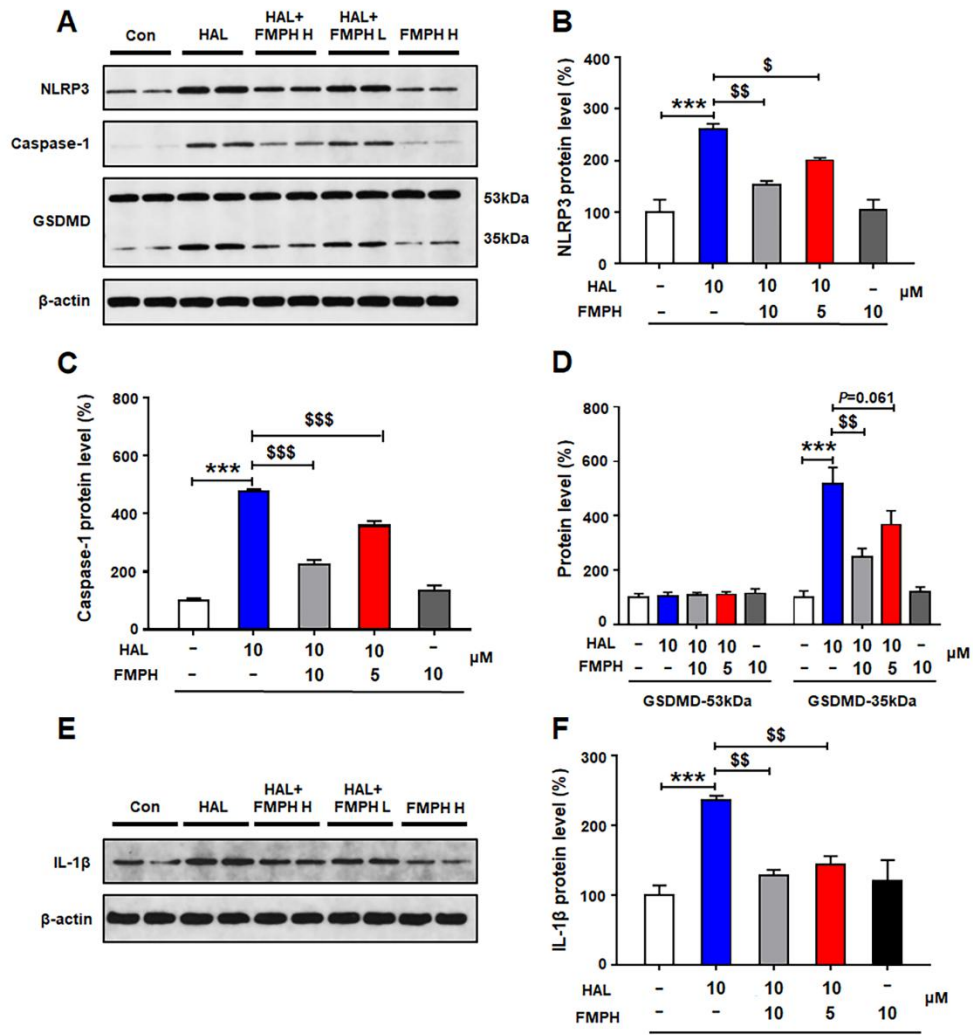

### 10.1 HAL+FMPH-NLRP3

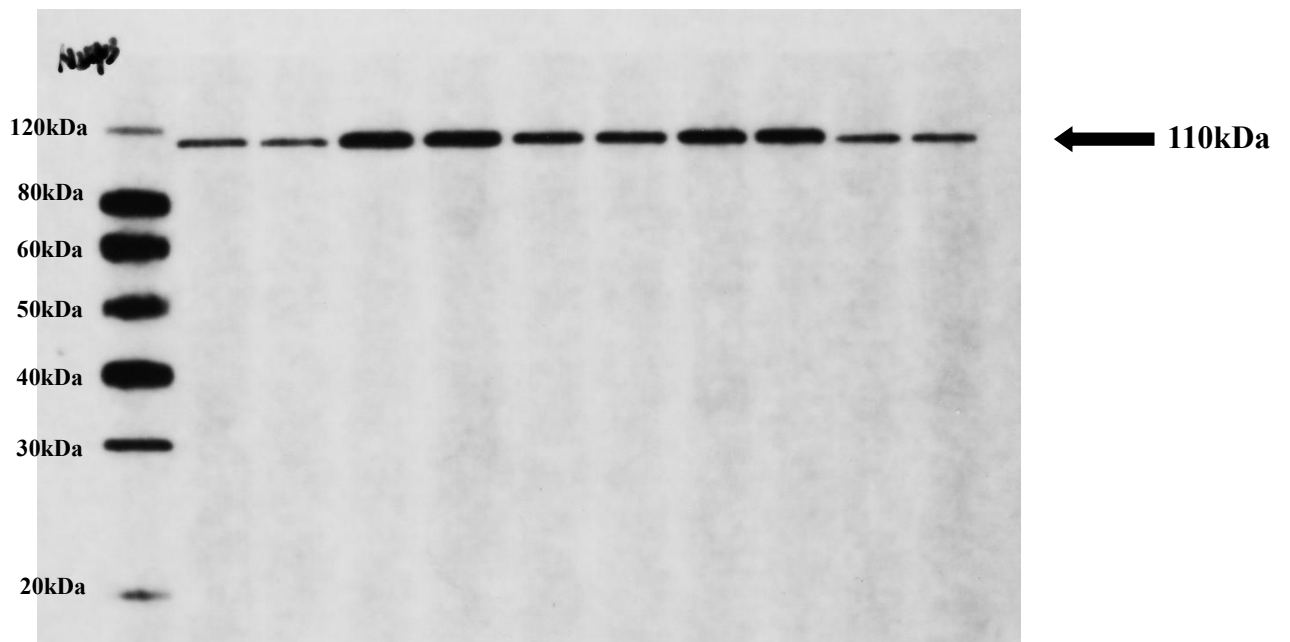

### 10.2 HAL+FMPH-Caspase-1

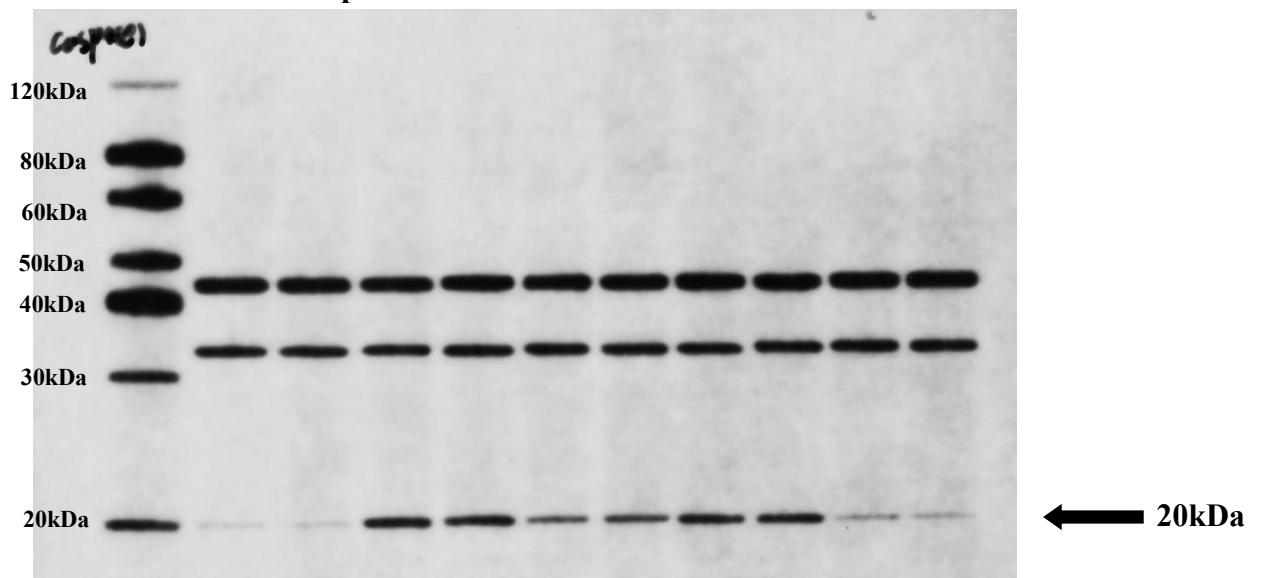



### 10.3 HAL+FMPH-GSDMD

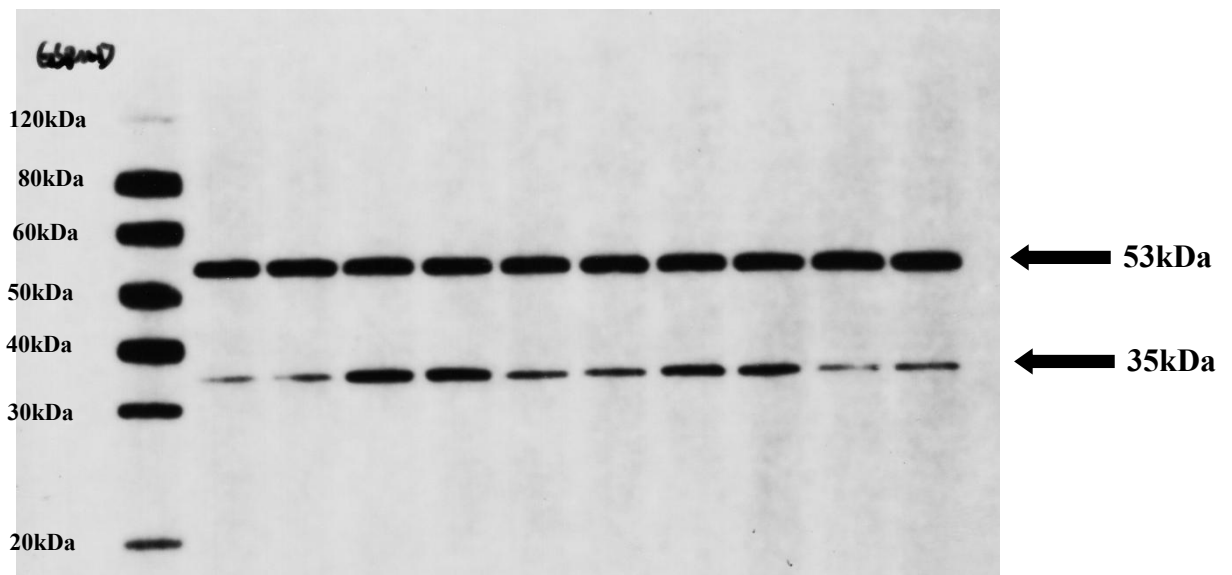

### 10.4 HAL+FMPH- $\beta$ -actin

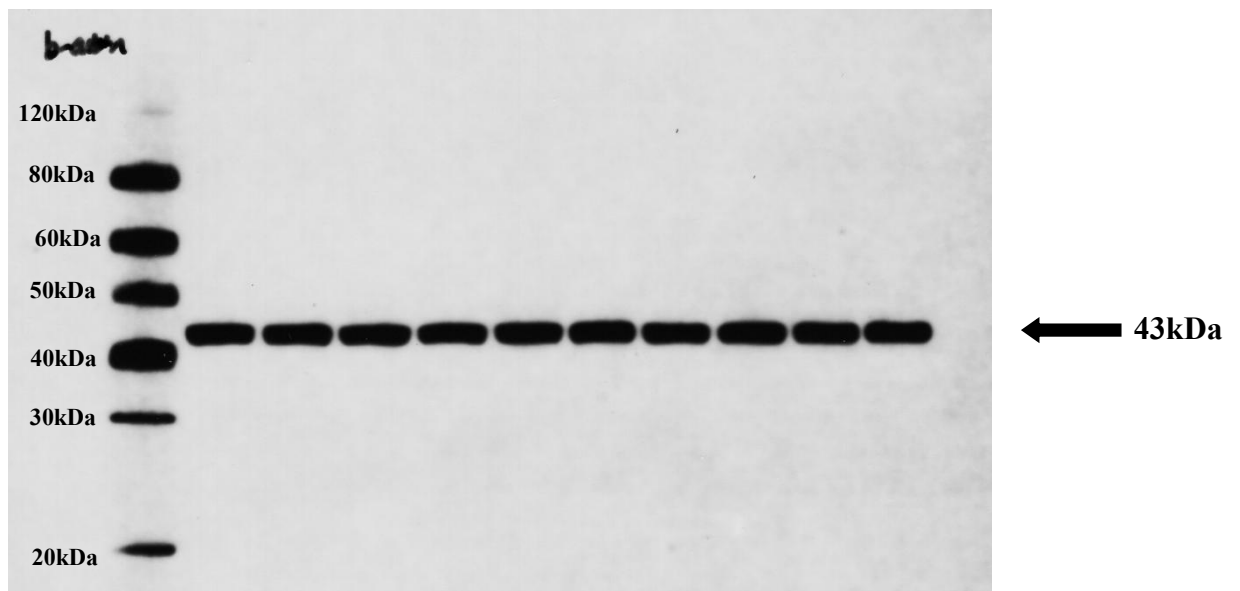

**10.5 HAL+FMPH-IL-1  $\beta$**

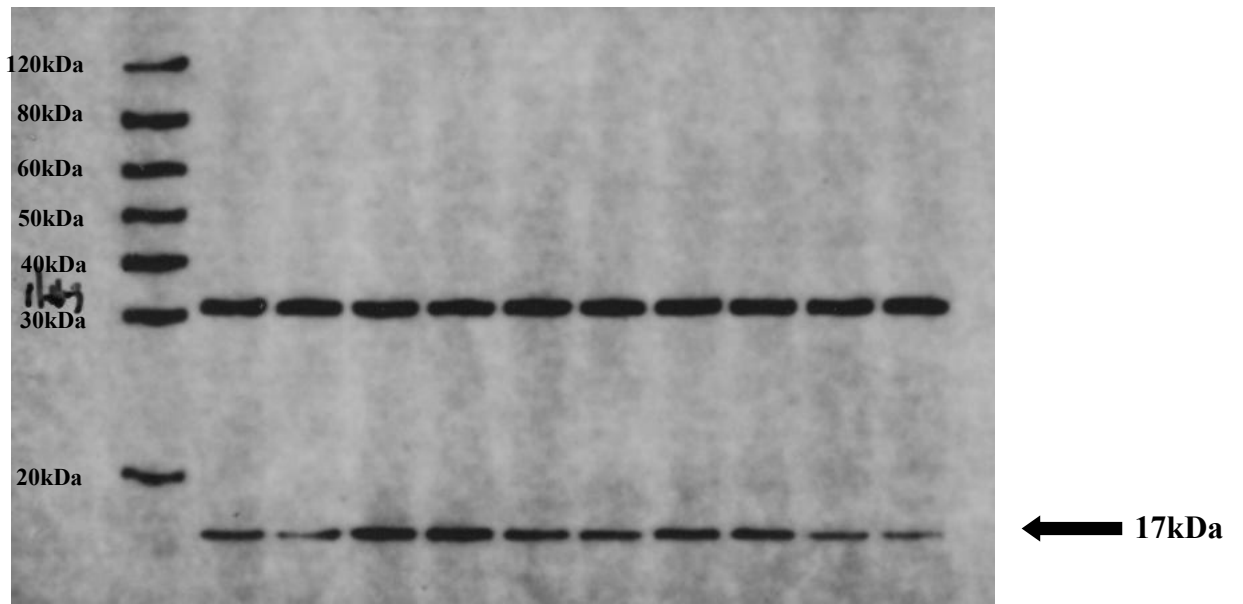

**10.5 HAL+FMPH-  $\beta$ -actin**

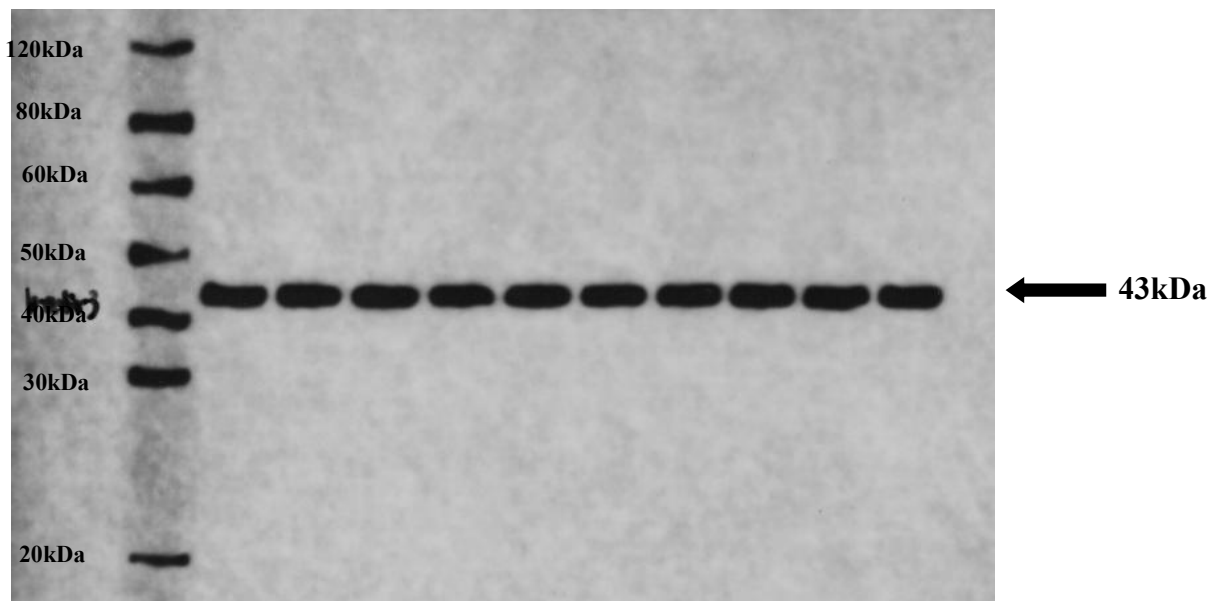

Supplement: Data_Sheet_1.pdf [file Data_Sheet_1.pdf]
